# Supplementary material for: Establishment of a robust single axis of cell polarity by coupling multiple positive feedback loops
Source: PubMed Central journal article supplement — Nat Commun. 2013 May 7;4:1807–. doi: 10.1038/ncomms2795 (PMC3674238; doi:10.1038/ncomms2795), 2013-05-07
Supplement: ncomms2795-s1.pdf [file ncomms2795-s1.pdf]

# **Establishment of a robust single axis of cell polarity by coupling of multiple positive feedback loops**

Tina Freisinger, Ben Klünder, Jared Johnson, Nikola Müller, Garwin Pichler, Gisela Beck, Michael Costanzo, Charles Boone, Richard A. Cerione, Erwin Frey and Roland Wedlich-Söldner

## **Supplementary Information**

1. Supplementary Figures S1-S5

2. Supplementary Tables S1-S10

3. Supplementary Methods

4. Supplementary References

## 1. Supplementary Figures

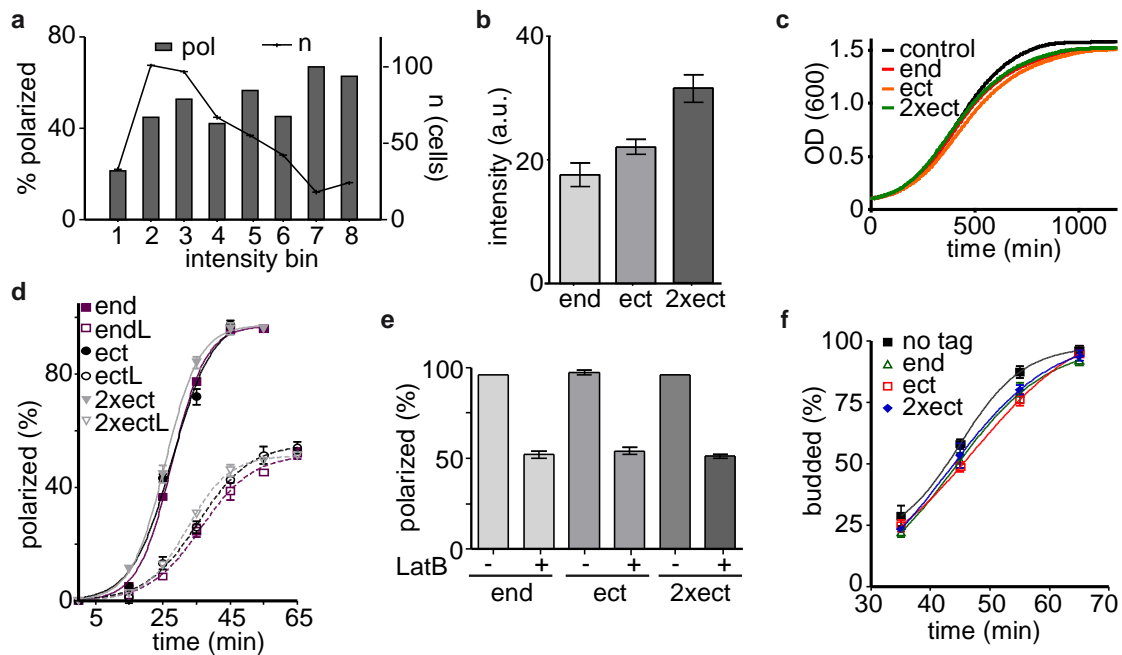

### Supplementary Figure S1. Effects of Cdc42 expression level on cell polarization.

(a) No correlation is seen between GFP-Cdc42 expression levels (intensity bins represent ranges of relative GFP fluorescence intensity) and polarization efficiency. The number of cells analyzed for each bin is indicated (axis on the right). Levels of GFP-Cdc42 were varied by inducing expression of a *GFP-CDC42* construct driven by the *GALI* promoter for 0.5-3 h as in <sup>30</sup>. Number of cells (n) shown in graph. (b) Fluorescence intensities of cells expressing GFP-Cdc42 inserted at the endogenous locus (end, 1 copy), at a single ectopic site (ect; two *CDC42* copies but only one with GFP) or at two ectopic sites (2xect, three copies but only two with GFP). Values represent mean  $\pm$  s.e.m. of 8 plate reader runs with > 1500 cells each. (c) Growth curves (average curves from three experiments shown) for control cells and cells expressing GFP-Cdc42 as indicated in (b). (d, e) Kinetics (d) and efficiency (e) of Cdc42 polarization in strains used in (b) and control cells after release from G1 arrest in the absence or presence of LatB. (f) Kinetics of bud formation in strains as indicated in (c). In (d-f) measurements represent mean  $\pm$  s.d. for three experiments with n = 50 cells each.

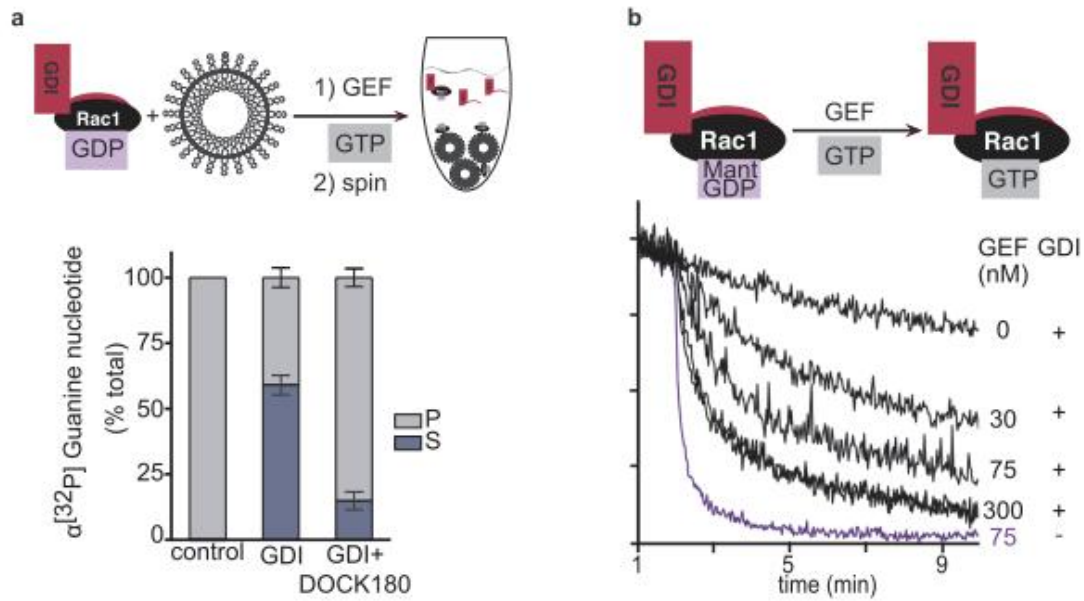

**Supplementary Figure S2. Competition between GEF and GDI for GTPase binding.**

(a) Schematic depiction (top) and result (bottom) of liposome pelleting assay. Addition of the Rac1-GEF DOCK180 blocks GDI-mediated extraction of Rac1 from liposomes. Amounts of radioactively labeled Rac1 were measured in pellet (P) and soluble (S) fractions after addition of GDI with or without the GEF domain of Dock180 (DHR2C). (b) Schematic depiction (top) and result (bottom) of the GDP exchange assay. The GDI inhibits nucleotide exchange. Rac1 was preloaded with Mant-GDP in the presence of liposomes, unlabelled GTP and GDI. Loss of Mant fluorescence due to nucleotide exchange was monitored after addition of the DHR2C GEF domain at 2 min. The exchange curve without added GDI is shown in purple. See **Supplementary Methods** for details.

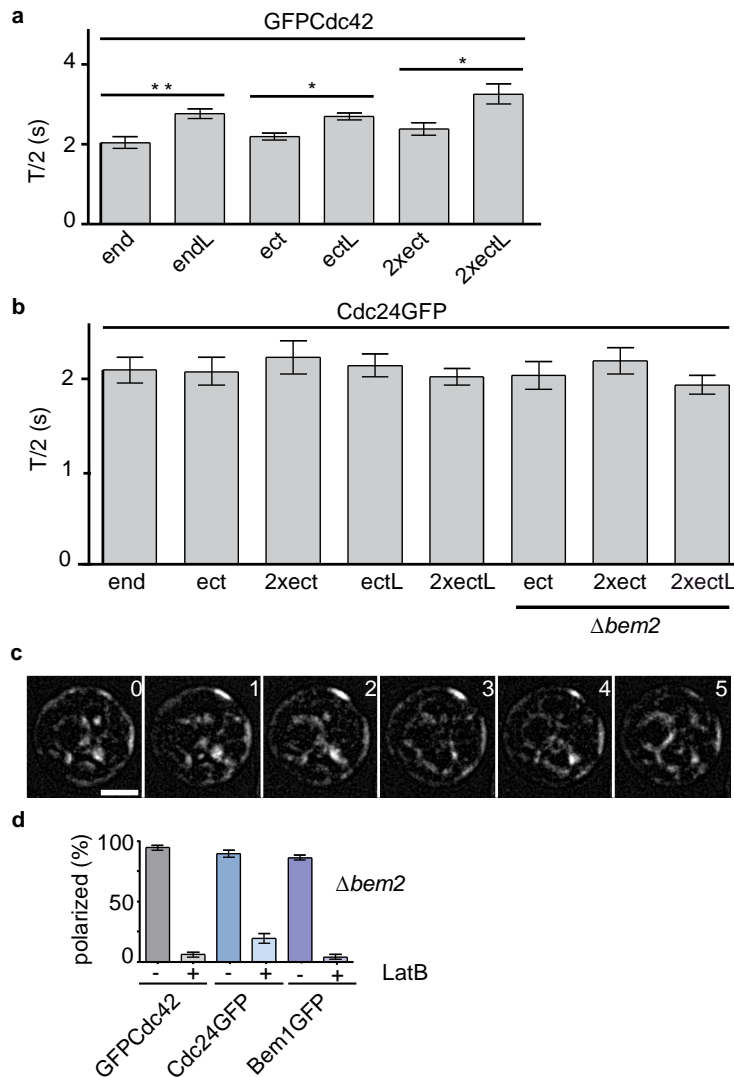

### Supplementary Figure S3. Turnover of Cdc42 and Cdc24 in polarized caps.

(a) T/2 of GFP-Cdc42 recovery after photobleaching of polar caps in cells expressing 1-3 copies of Cdc42 (see **Supplementary Fig. S1b**) with (endL, n = 11; ectL, n = 24; 2xectL, n = 12) and without (end, n = 24; ect, n = 56; 2xect, n = 10) LatB treatment. Bars represent means  $\pm$  s.e.m.. Significant ( $p < 0.05$ , \*) and highly significant ( $p < 0.01$ , \*\*) differences are indicated (unpaired t-test with Welch correction). (b) T/2 of Cdc24-GFP in polar caps in cells expressing 1-3 copies of Cdc24 (endogenously tagged or ectopically integrated copies). Recovery values (means  $\pm$  s.e.m.) are shown for control cells (n [end] = 10; n [ect] = 20; n [2xect] = 11), cells treated with LatB ([ectL] = 14; n [2xectL] = 17), and  $\Delta$ bem2 cells (n [ect] = 10; n [2xect] = 10; n [2xectL] = 11). (c) An unstable GFP-Cdc42 cap in a cell exposed to LatB. Time is indicated in min. Scale bar: 4  $\mu$ m. Images were subjected to background subtraction and Gaussian smoothing in ImageJ. (d) Bar graphs showing loss of polarization in  $\Delta$ bem2 cells treated or non-treated with LatB and expressing the indicated polarity marker. Bars correspond to mean  $\pm$  s.d. of 3 experiments with 50 cells each.

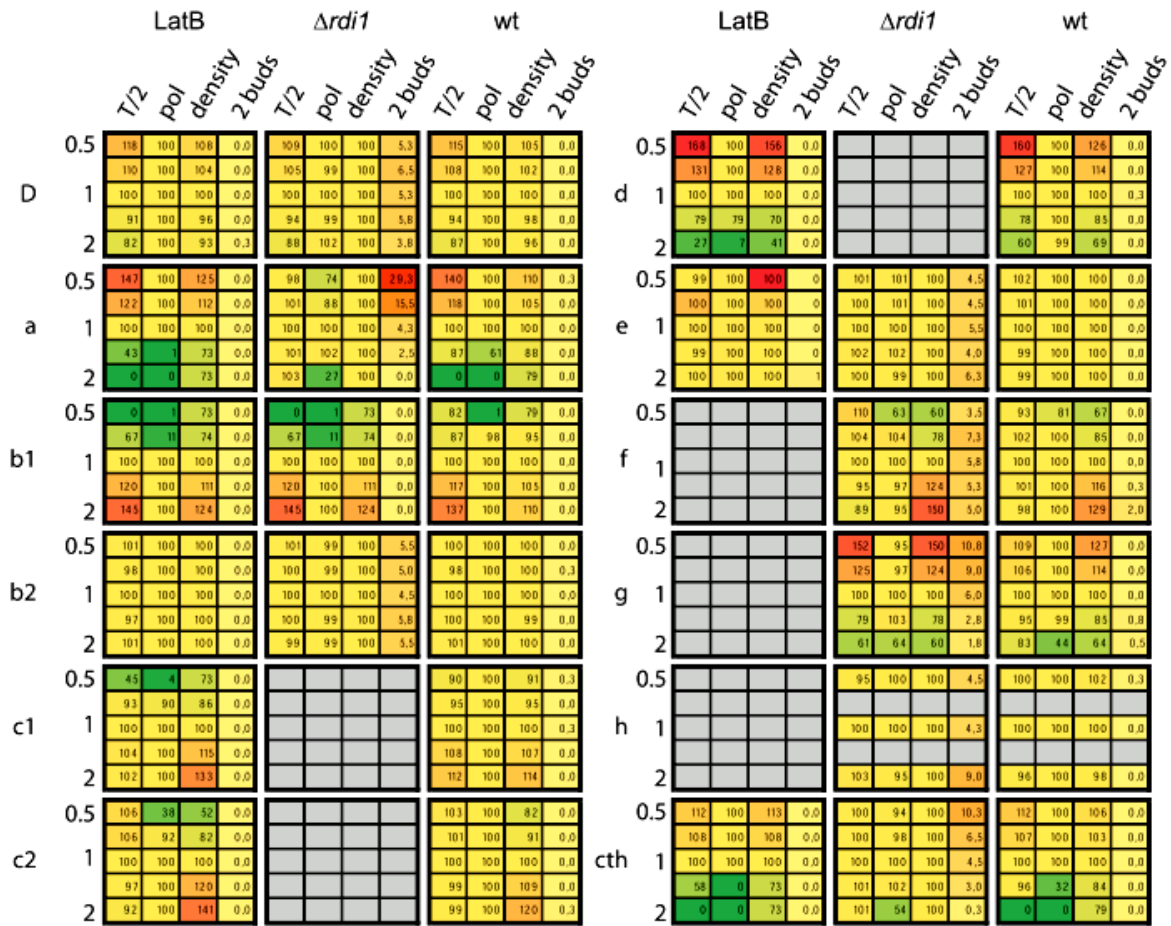

**Supplementary Figure S4: Results of the parameter scan.** Shown are the changes in various readouts (T/2: FRAP recovery halftime, pol: polarization efficiency, density: average Cdc42 density on plasma membrane, 2 buds: number of cells forming two buds) upon changing key parameters in our models between 2 and 0.5 fold. Parameters that are varied are indicated left of the respective matrices. For each parameter the scan results are shown for cells without actin (LatB), without the GDI ( $\Delta rdi1$ ) or for control cells (wt). For the columns "T/2", "pol" and "density" all values are shown in % of the original parameter value (1). For the column "2 buds" the actual percentage of cells with double buds is shown. Color coding: greens indicate lower values, red/dark orange indicate higher values. Yellow/light orange indicate little change compared to the original parameter value.

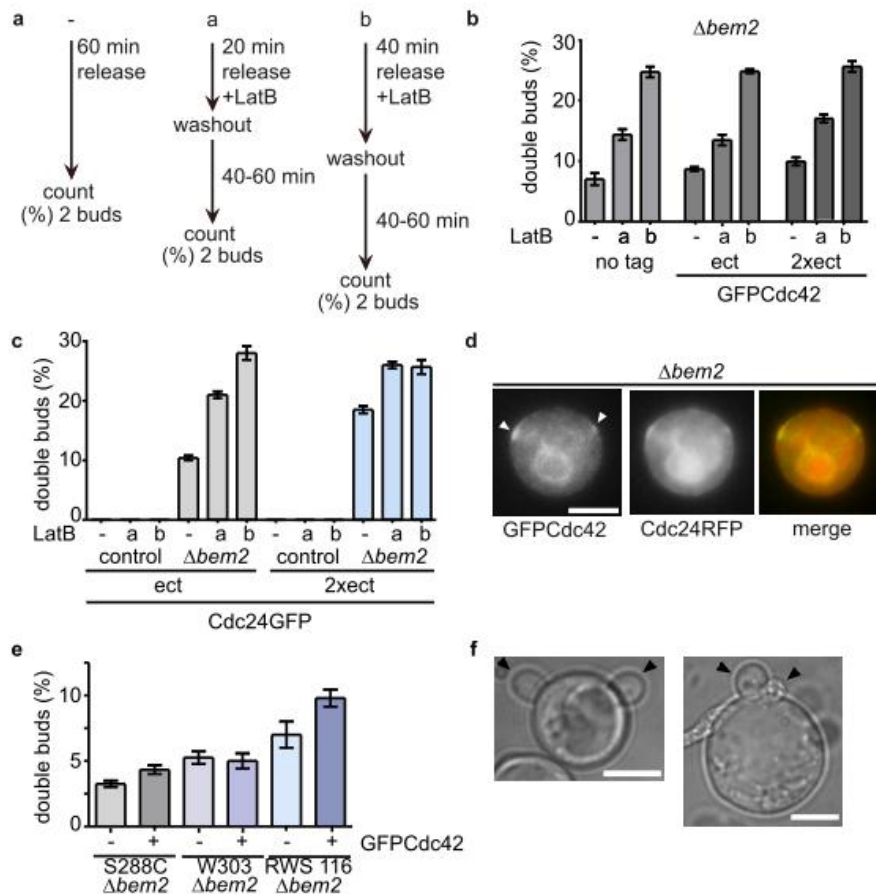

### Supplementary Figure S5. Formation of multiple polarization sites.

(a) Schematic representation of LatB washout procedure. (b) Effect of prior exposure to LatB (conditions for -, a and b as in (a)) on percentage of cells with two buds formed by a  $\Delta bem2$  strain expressing one (no tag), two (GFP-Cdc42) or three (2xGFP-Cdc42) copies of *CDC42*. Buds counted 60 min after removal of LatB. (c) Effect of prior exposure to LatB (conditions for -, a and b as in (a)) on the percentage of cells with two buds formed by control and *bem2* $\Delta$  strains expressing two (*Cdc24*-GFP) or three (2x*Cdc24*-GFP) copies of *CDC24*. Buds counted 60 min after removal of LatB. (d) Colocalization of GFP-Cdc42 (green in merge) and *Cdc24*-RFP (red in merge) in two caps (arrowheads) in a  $\Delta bem2$  cell. (e) Bar diagram showing the number of double budded cells (in percent) in synchronized cells (RWS116) or cycling cells (S288C, W303) where the *Cdc42* GAP *BEM2* has been deleted. Numbers are shown for untransformed cells ("-") or cells expressing GFP-Cdc42 from a plasmid ("+", GM-Cdc42, RWC108). (f) Two examples of double-budded W303  $\Delta bem2$  cells. Bars in (b), (c) and (e) represent mean  $\pm$  s.d. from at least three experiments with >100 cells each (data for (b) and (c) in **Supplementary Table S4**). Scale bars 4  $\mu$ m.

## 2. Supplementary Tables

**Supplementary Table S1.** Genetic interactions\*

| <b>Query</b> | <b>Interactor</b> | <b>Experiment</b>            | <b>Interactor Category</b> |
|--------------|-------------------|------------------------------|----------------------------|
| BEM1         | RSR1              | (This study)                 | CDC42 SIGNALING            |
| BEM1         | VPS9              | (This study)                 | ENDOCYTIC RECYCLING        |
| RDI1         | GOS1              | (This study)                 | EARLY SECRETION            |
| BEM2         | RDI1              | (This study)                 | CDC42 Module               |
| CDC42        | MSB3              | SYNTHETIC GROWTH DEFECT      | LATE SECRETION             |
| CDC42        | CAP1              | SYNTHETIC GROWTH DEFECT      | ENDOCYTIC RECYCLING        |
| CDC42        | BUD6              | SYNTHETIC GROWTH DEFECT      | ACTIN GENERAL              |
| CDC42        | GIC2              | SYNTHETIC GROWTH DEFECT      | CDC42 SIGNALING            |
| CDC42        | CAP2              | SYNTHETIC GROWTH DEFECT      | ACTIN GENERAL              |
| BEM2         | PXL1              | SYNTHETIC GROWTH DEFECT      | ACTIN GENERAL              |
| CLA4         | RGA1              | SYNTHETIC GROWTH DEFECT      | CDC42 Module               |
| CLA4         | RGA2              | SYNTHETIC GROWTH DEFECT      | CDC42 Module               |
| BEM2         | GET2              | SYNTHETIC GROWTH DEFECT      | EARLY SECRETION            |
| BEM2         | GET1              | SYNTHETIC GROWTH DEFECT      | EARLY SECRETION            |
| BEM2         | BEM3              | SYNTHETIC GROWTH DEFECT      | CDC42 Module               |
| CLA4         | RVS161            | SYNTHETIC GROWTH DEFECT      | ACTIN GENERAL              |
| CLA4         | PEA2              | SYNTHETIC GROWTH DEFECT      | ACTIN GENERAL              |
| RGA1         | RIC1              | SYNTHETIC GROWTH DEFECT      | ENDOCYTIC RECYCLING        |
| CLA4         | RVS167            | SYNTHETIC GROWTH DEFECT      | ACTIN GENERAL              |
| CLA4         | ICE2              | SYNTHETIC GROWTH DEFECT      | EARLY SECRETION            |
| CDC42        | SPA2              | SYNTHETIC GROWTH DEFECT      | ACTIN GENERAL              |
| CDC42        | RSR1              | SYNTHETIC GROWTH DEFECT      | CDC42 SIGNALING            |
| CLA4         | CHS6              | SYNTHETIC GROWTH DEFECT      | LATE SECRETION             |
| CLA4         | CHS5              | SYNTHETIC GROWTH DEFECT      | LATE SECRETION             |
| BEM1         | ACT1              | SYNTHETIC HAPLOINSUFFICIENCY | ACTIN GENERAL              |
| BEM2         | ACT1              | SYNTHETIC HAPLOINSUFFICIENCY | ACTIN GENERAL              |
| BEM2         | SMY1              | SYNTHETIC LETHALITY          | LATE SECRETION             |
| CLA4         | CHS5              | SYNTHETIC LETHALITY          | LATE SECRETION             |
| CLA4         | SMY1              | SYNTHETIC LETHALITY          | LATE SECRETION             |
| CLA4         | EDE1              | SYNTHETIC LETHALITY          | ENDOCYTIC RECYCLING        |
| CLA4         | CHS6              | SYNTHETIC LETHALITY          | LATE SECRETION             |
| CLA4         | BNI1              | SYNTHETIC LETHALITY          | ACTIN GENERAL              |
| CLA4         | BEM4              | SYNTHETIC LETHALITY          | CDC42 SIGNALING            |
| CLA4         | ARP2              | SYNTHETIC LETHALITY          | ACTIN GENERAL              |
| BEM1         | BBC1              | SYNTHETIC LETHALITY          | ACTIN GENERAL              |
| BEM2         | TPM1              | SYNTHETIC LETHALITY          | ACTIN GENERAL              |
| CLA4         | BUD6              | SYNTHETIC LETHALITY          | ACTIN GENERAL              |
| CLA4         | RVS167            | SYNTHETIC LETHALITY          | ACTIN GENERAL              |
| CLA4         | RVS161            | SYNTHETIC LETHALITY          | ACTIN GENERAL              |
| CLA4         | VAC14             | SYNTHETIC LETHALITY          | ENDOCYTIC RECYCLING        |
| BEM2         | CHS5              | SYNTHETIC LETHALITY          | LATE SECRETION             |
| CLA4         | SPA2              | SYNTHETIC LETHALITY          | ACTIN GENERAL              |
| CLA4         | MYO2              | SYNTHETIC LETHALITY          | LATE SECRETION             |
| BEM2         | SAC6              | SYNTHETIC LETHALITY          | ACTIN GENERAL              |
| CLA4         | FAB1              | SYNTHETIC LETHALITY          | ENDOCYTIC RECYCLING        |
| BEM2         | MYO2              | SYNTHETIC LETHALITY          | LATE SECRETION             |
| BEM1         | ARP2              | SYNTHETIC LETHALITY          | ACTIN GENERAL              |
| CLA4         | PEA2              | SYNTHETIC LETHALITY          | ACTIN GENERAL              |

|       |       |                                   |                       |
|-------|-------|-----------------------------------|-----------------------|
| CDC42 | PEA2  | SYNTHETIC LETHALITY               | ACTIN GENERAL         |
| CDC24 | SEC15 | SYNTHETIC LETHALITY               | LATE SECRETION        |
| CDC42 | MSB3  | SYNTHETIC LETHALITY               | LATE SECRETION        |
| CDC42 | SEC10 | SYNTHETIC LETHALITY               | LATE SECRETION        |
| CDC42 | RSR1  | SYNTHETIC LETHALITY               | CDC42 SIGNALING       |
| BEM1  | BNI1  | SYNTHETIC LETHALITY               | ACTIN GENERAL         |
| CDC42 | BUD6  | SYNTHETIC LETHALITY               | ACTIN GENERAL         |
| CDC42 | BEM4  | SYNTHETIC LETHALITY               | CDC42 SIGNALING       |
| CDC42 | BNI1  | SYNTHETIC LETHALITY               | ACTIN GENERAL         |
| CDC42 | GIC2  | SYNTHETIC LETHALITY               | CDC42 SIGNALING       |
| CDC42 | CAP2  | SYNTHETIC LETHALITY               | ACTIN GENERAL         |
| CDC42 | SEC8  | SYNTHETIC LETHALITY               | LATE SECRETION        |
| CDC42 | SEC66 | SYNTHETIC LETHALITY               | EARLY SECRETION       |
| CDC42 | SEC5  | SYNTHETIC LETHALITY               | LATE SECRETION        |
| CLA4  | ARC40 | SYNTHETIC LETHALITY               | ACTIN GENERAL         |
| CDC42 | SPA2  | SYNTHETIC LETHALITY               | ACTIN GENERAL         |
| CDC42 | SEC9  | SYNTHETIC LETHALITY               | LATE SECRETION        |
| CDC42 | SEC2  | SYNTHETIC LETHALITY               | LATE SECRETION        |
| CDC42 | SEC15 | SYNTHETIC LETHALITY               | LATE SECRETION        |
| CDC42 | CAP1  | SYNTHETIC LETHALITY               | ENDOCYTOTIC RECYCLING |
| CDC24 | BEM4  | SYNTHETIC LETHALITY               | CDC42 SIGNALING       |
| CDC42 | SEC3  | SYNTHETIC LETHALITY               | LATE SECRETION        |
| CDC42 | SEC4  | SYNTHETIC LETHALITY               | LATE SECRETION        |
| BEM2  | BNI1  | SYNTHETIC LETHALITY               | ACTIN GENERAL         |
| BEM2  | ARC40 | SYNTHETIC LETHALITY               | ACTIN GENERAL         |
| RGA1  | RIC1  | SYNTHETIC LETHALITY               | ENDOCYTOTIC RECYCLING |
| BEM2  | CDC24 | SYNTHETIC LETHALITY               | CDC42 Module          |
| BEM2  | RGA1  | SYNTHETIC LETHALITY               | CDC42 Module          |
| BEM2  | ARP2  | SYNTHETIC LETHALITY               | ACTIN GENERAL         |
| BEM2  | CLA4  | SYNTHETIC LETHALITY               | CDC42 Module          |
| BEM1  | ARC40 | SYNTHETIC LETHALITY               | ACTIN GENERAL         |
| BEM1  | CDC42 | SYNTHETIC LETHALITY               | CDC42 Module          |
| BEM1  | CDC24 | SYNTHETIC LETHALITY               | CDC42 Module          |
| BEM1  | BEM2  | SYNTHETIC LETHALITY               | CDC42 Module          |
| BEM2  | ACT1  | SYNTHETIC LETHALITY               | ACTIN GENERAL         |
| BEM1  | SMY1  | SYNTHETIC LETHALITY               | LATE SECRETION        |
| BEM1  | CLA4  | SYNTHETIC LETHALITY               | CDC42 Module          |
| BEM3  | CDC24 | SYNTHETIC LETHALITY               | CDC42 Module          |
| CDC24 | CDC42 | SYNTHETIC LETHALITY               | CDC42 Module          |
| CDC42 | CLA4  | SYNTHETIC LETHALITY               | CDC42 Module          |
| BEM1  | MYO2  | SYNTHETIC LETHALITY               | LATE SECRETION        |
| CDC24 | CDC42 | SYNTHETIC LETHALITY (CONDITIONAL) | CDC42 Module          |
| BEM1  | RDI1  | <sup>33</sup>                     | CDC42 Module          |
| BEM1  | CDC42 | <sup>33</sup>                     | CDC42 Module          |
| BEM1  | BOI1  | <sup>33</sup>                     | CDC42 SIGNALING       |
| BEM1  | CAP2  | <sup>33</sup>                     | ACTIN GENERAL         |
| BEM1  | CHS6  | <sup>33</sup>                     | LATE SECRETION        |
| CDC42 | SRO7  | <sup>33</sup>                     | LATE SECRETION        |
| CDC42 | TPM1  | <sup>33</sup>                     | ACTIN GENERAL         |
| BEM1  | ACT1  | <sup>33</sup>                     | ACTIN GENERAL         |
| CLA4  | RGA1  | <sup>33</sup>                     | CDC42 Module          |
| BEM1  | BEM4  | <sup>33</sup>                     | CDC42 SIGNALING       |
| CDC42 | SPA2  | <sup>33</sup>                     | ACTIN GENERAL         |



|       |        |    |                      |
|-------|--------|----|----------------------|
| BEM1  | AIP1   | 33 | ACTIN GENERAL        |
| BEM2  | CLA4   | 33 | CDC42 Module         |
| CDC42 | GIC2   | 33 | CDC42 SIGNALING      |
| BEM3  | RGA1   | 33 | CDC42 Module         |
| BEM2  | RGA1   | 33 | CDC42 Module         |
| BEM1  | BUD6   | 33 | ACTIN GENERAL        |
| BEM2  | BEM3   | 33 | CDC42 Module         |
| CDC42 | CAP1   | 33 | ENDOCYTTIC RECYCLING |
| BEM1  | ARC18  | 33 | ACTIN GENERAL        |
| BEM1  | CAP1   | 33 | ENDOCYTTIC RECYCLING |
| BEM2  | CDC42  | 33 | CDC42 Module         |
| CDC42 | CAP2   | 33 | ACTIN GENERAL        |
| CLA4  | SHE4   | 33 | LATE SECRETION       |
| RDI1  | YCK2   | 33 | ENDOCYTTIC RECYCLING |
| CLA4  | RVS161 | 33 | ACTIN GENERAL        |
| RDI1  | VRP1   | 33 | ACTIN GENERAL        |
| BEM1  | ARF1   | 33 | EARLY SECRETION      |
| CLA4  | PEA2   | 33 | ACTIN GENERAL        |
| CLA4  | CHS5   | 33 | LATE SECRETION       |
| RGA1  | ACT1   | 33 | ACTIN GENERAL        |
| BEM1  | ARF3   | 33 | ENDOCYTTIC RECYCLING |
| CLA4  | YEL1   | 33 | ENDOCYTTIC RECYCLING |
| CLA4  | TPM1   | 33 | ACTIN GENERAL        |
| RDI1  | TOS2   | 33 | CDC42 SIGNALING      |
| RDI1  | BEM4   | 33 | CDC42 SIGNALING      |
| RDI1  | PEA2   | 33 | ACTIN GENERAL        |
| CLA4  | SMY1   | 33 | LATE SECRETION       |
| CLA4  | SLA1   | 33 | ACTIN GENERAL        |
| CLA4  | SPA2   | 33 | ACTIN GENERAL        |
| RDI1  | VPS27  | 33 | ENDOCYTTIC RECYCLING |
| RGA1  | SRO7   | 33 | LATE SECRETION       |
| CLA4  | BUD6   | 33 | ACTIN GENERAL        |
| CLA4  | CAP2   | 33 | ACTIN GENERAL        |
| CLA4  | CAP1   | 33 | ENDOCYTTIC RECYCLING |
| RGA2  | GET1   | 33 | EARLY SECRETION      |
| CLA4  | BEM4   | 33 | CDC42 SIGNALING      |
| RGA1  | VPS9   | 33 | ENDOCYTTIC RECYCLING |
| RGA1  | VRP1   | 33 | ACTIN GENERAL        |
| RGA1  | BUD14  | 33 | ACTIN GENERAL        |
| BEM1  | ATG8   | 33 | EARLY SECRETION      |
| CLA4  | EDE1   | 33 | ENDOCYTTIC RECYCLING |
| RGA1  | CMD1   | 33 | ACTIN GENERAL        |
| CLA4  | ICE2   | 33 | EARLY SECRETION      |
| RGA1  | SLA1   | 33 | ACTIN GENERAL        |
| RGA1  | SLY41  | 33 | EARLY SECRETION      |
| BEM1  | BBC1   | 33 | ACTIN GENERAL        |
| CLA4  | CHS6   | 33 | LATE SECRETION       |
| BEM2  | CCZ1   | 33 | ENDOCYTTIC RECYCLING |
| BEM2  | BUL1   | 33 | ENDOCYTTIC RECYCLING |
| BEM2  | BUD6   | 33 | ACTIN GENERAL        |
| BEM2  | BUD14  | 33 | ACTIN GENERAL        |
| BEM2  | CCZ1   | 33 | ENDOCYTTIC RECYCLING |
| BEM2  | CAP2   | 33 | ACTIN GENERAL        |

|       |        |    |                     |
|-------|--------|----|---------------------|
| BEM2  | CAP1   | 33 | ENDOCYTIC RECYCLING |
| BEM2  | BST1   | 33 | EARLY SECRETION     |
| BEM2  | APL1   | 33 | ENDOCYTIC RECYCLING |
| BEM2  | ACT1   | 33 | ACTIN GENERAL       |
| BEM1  | SEC61  | 33 | LATE SECRETION      |
| BEM2  | BNI1   | 33 | ACTIN GENERAL       |
| BEM2  | ARF1   | 33 | EARLY SECRETION     |
| BEM2  | APS2   | 33 | ENDOCYTIC RECYCLING |
| CDC24 | RIC1   | 33 | ENDOCYTIC RECYCLING |
| BEM1  | FAR10  | 33 | CDC42 SIGNALING     |
| BEM1  | GIC1   | 33 | CDC42 SIGNALING     |
| BEM2  | GCS1   | 33 | EARLY SECRETION     |
| BEM2  | MYO2   | 33 | LATE SECRETION      |
| BEM2  | ICE2   | 33 | EARLY SECRETION     |
| BEM2  | GIC1   | 33 | CDC42 SIGNALING     |
| BEM2  | ERV14  | 33 | EARLY SECRETION     |
| BEM2  | CLC1   | 33 | ENDOCYTIC RECYCLING |
| BEM2  | CHS6   | 33 | LATE SECRETION      |
| BEM2  | CHS5   | 33 | LATE SECRETION      |
| BEM2  | COG7   | 33 | EARLY SECRETION     |
| BEM2  | COG6   | 33 | EARLY SECRETION     |
| BEM2  | CMD1   | 33 | ACTIN GENERAL       |
| BEM1  | RVS167 | 33 | ACTIN GENERAL       |
| BEM1  | RVS161 | 33 | ACTIN GENERAL       |
| BEM1  | RUD3   | 33 | EARLY SECRETION     |
| BEM1  | SEC3   | 33 | LATE SECRETION      |
| BEM1  | SEC15  | 33 | LATE SECRETION      |
| BEM1  | SEC10  | 33 | LATE SECRETION      |
| BEM1  | KES1   | 33 | EARLY SECRETION     |
| BEM1  | PEA2   | 33 | ACTIN GENERAL       |
| BEM1  | MYO2   | 33 | LATE SECRETION      |
| BEM1  | KIN1   | 33 | LATE SECRETION      |
| BEM1  | RHB1   | 33 | EARLY SECRETION     |
| BEM1  | RGP1   | 33 | ENDOCYTIC RECYCLING |
| BEM1  | PXL1   | 33 | ACTIN GENERAL       |
| BEM1  | YPT31  | 33 | LATE SECRETION      |
| BEM1  | VPS74  | 33 | EARLY SECRETION     |
| BEM1  | VPS51  | 33 | ENDOCYTIC RECYCLING |
| BEM1  | VPS17  | 33 | ENDOCYTIC RECYCLING |
| BEM1  | YEL1   | 33 | ENDOCYTIC RECYCLING |
| BEM1  | VRP1   | 33 | ACTIN GENERAL       |
| BEM1  | GIC2   | 33 | CDC42 SIGNALING     |
| BEM1  | TPM1   | 33 | ACTIN GENERAL       |
| BEM1  | SHE4   | 33 | LATE SECRETION      |
| BEM1  | SEC72  | 33 | EARLY SECRETION     |
| BEM1  | SEC63  | 33 | LATE SECRETION      |
| BEM1  | SYT1   | 33 | LATE SECRETION      |
| BEM1  | SPA2   | 33 | ACTIN GENERAL       |
| BEM1  | SMY1   | 33 | LATE SECRETION      |
| CDC24 | CAP2   | 33 | ACTIN GENERAL       |
| CDC24 | CAP1   | 33 | ENDOCYTIC RECYCLING |
| CDC24 | BUD6   | 33 | ACTIN GENERAL       |
| CDC24 | PEA2   | 33 | ACTIN GENERAL       |

|       |           |    |                      |
|-------|-----------|----|----------------------|
| CDC24 | GIC2      | 33 | CDC42 SIGNALING      |
| CDC24 | COG7      | 33 | EARLY SECRETION      |
| CDC24 | BEM4      | 33 | CDC42 SIGNALING      |
| BEM3  | EDE1      | 33 | ENDOCYTTIC RECYCLING |
| BEM3  | CHS5      | 33 | LATE SECRETION       |
| BEM2  | SPA2      | 33 | ACTIN GENERAL        |
| BEM3  | SMY1      | 33 | LATE SECRETION       |
| BEM3  | SLA1      | 33 | ACTIN GENERAL        |
| BEM3  | SHE4      | 33 | LATE SECRETION       |
| CDC42 | BEM4      | 33 | CDC42 SIGNALING      |
| CDC24 | VPS41     | 33 | ENDOCYTTIC RECYCLING |
| CDC24 | VAM7      | 33 | ENDOCYTTIC RECYCLING |
| CDC24 | VAM6      | 33 | ENDOCYTTIC RECYCLING |
| CDC24 | YPT7      | 33 | ENDOCYTTIC RECYCLING |
| CDC24 | YPT32     | 33 | LATE SECRETION       |
| CDC24 | YJL206C-A | 33 | LATE SECRETION       |
| CDC24 | VAM3      | 33 | ENDOCYTTIC RECYCLING |
| CDC24 | SPA2      | 33 | ACTIN GENERAL        |
| CDC24 | SNX41     | 33 | ENDOCYTTIC RECYCLING |
| CDC24 | RSR1      | 33 | CDC42 SIGNALING      |
| CDC24 | TPM1      | 33 | ACTIN GENERAL        |
| CDC24 | TLG2      | 33 | EARLY SECRETION      |
| CDC24 | SPH1      | 33 | LATE SECRETION       |
| BEM2  | SHE4      | 33 | LATE SECRETION       |
| BEM2  | SEC72     | 33 | EARLY SECRETION      |
| BEM2  | SEC66     | 33 | LATE SECRETION       |
| BEM2  | SNC2      | 33 | LATE SECRETION       |
| BEM2  | SMY1      | 33 | LATE SECRETION       |
| BEM2  | SHE4      | 33 | LATE SECRETION       |
| BEM2  | SEC3      | 33 | LATE SECRETION       |
| BEM2  | RSR1      | 33 | CDC42 SIGNALING      |
| BEM2  | PXL1      | 33 | ACTIN GENERAL        |
| BEM1  | ERV41     | 33 | EARLY SECRETION      |
| BEM2  | SEC15     | 33 | LATE SECRETION       |
| BEM2  | SEC10     | 33 | LATE SECRETION       |
| BEM2  | RUD3      | 33 | EARLY SECRETION      |
| BEM3  | BNI1      | 33 | ACTIN GENERAL        |
| BEM2  | YCK1      | 33 | ENDOCYTTIC RECYCLING |
| BEM2  | VPS74     | 33 | EARLY SECRETION      |
| BEM2  | VPS51     | 33 | EARLY SECRETION      |
| BEM3  | ARC15     | 33 | ACTIN GENERAL        |
| BEM2  | YPT32     | 33 | LATE SECRETION       |
| BEM2  | YCK2      | 33 | ENDOCYTTIC RECYCLING |
| BEM2  | VPS30     | 33 | ENDOCYTTIC RECYCLING |
| BEM2  | SYT1      | 33 | LATE SECRETION       |
| BEM2  | SSO2      | 33 | LATE SECRETION       |
| BEM2  | SSO1      | 33 | LATE SECRETION       |
| BEM2  | VPS21     | 33 | ENDOCYTTIC RECYCLING |
| BEM2  | VAC14     | 33 | ENDOCYTTIC RECYCLING |
| BEM2  | TPM1      | 33 | ACTIN GENERAL        |

\* : only negative genetic interactions were included

**Supplementary Table S2. Physical interactions**

| <b>Query</b> | <b>Interactor</b> | <b>Experiment</b>        | <b>Interactor Category</b> |
|--------------|-------------------|--------------------------|----------------------------|
| BEM1         | ACT1              | AFFINITY CAPTURE-WESTERN | ACTIN GENERAL              |
| BEM1         | ACT1              | AFFINITY PRECIPITATION   | ACTIN GENERAL              |
| BEM1         | ACT1              | PHYSICAL INTERACTION     | ACTIN GENERAL              |
| BEM1         | ACT1              | TWO HYBRID               | ACTIN GENERAL              |
| BEM1         | LAS17             | AFFINITY CAPTURE-WESTERN | ACTIN GENERAL              |
| BEM1         | LAS17             | PHYSICAL INTERACTION     | ACTIN GENERAL              |
| BEM2         | BUD14             | AFFINITY CAPTURE-MS      | ACTIN GENERAL              |
| BEM2         | BUD14             | PHYSICAL INTERACTION     | ACTIN GENERAL              |
| BEM2         | SPA2              | AFFINITY CAPTURE-MS      | ACTIN GENERAL              |
| CDC42        | BNI1              | PHYSICAL INTERACTION     | ACTIN GENERAL              |
| CDC42        | BNI1              | TWO HYBRID               | ACTIN GENERAL              |
| CLA4         | ABP1              | PHYSICAL INTERACTION     | ACTIN GENERAL              |
| CLA4         | ABP1              | TWO HYBRID               | ACTIN GENERAL              |
| CLA4         | SLA2              | PHYSICAL INTERACTION     | ACTIN GENERAL              |
| CLA4         | SLA2              | TWO HYBRID               | ACTIN GENERAL              |
| RGA1         | CMD1              | AFFINITY CAPTURE-MS      | ACTIN GENERAL              |
| BEM1         | BOI1              | AFFINITY CAPTURE-MS      | CDC42 SIGNALING            |
| BEM1         | BOI1              | AFFINITY PRECIPITATION   | CDC42 SIGNALING            |
| BEM1         | BOI1              | PCA                      | CDC42 SIGNALING            |
| BEM1         | BOI1              | PHYSICAL INTERACTION     | CDC42 SIGNALING            |
| BEM1         | BOI1              | TWO HYBRID               | CDC42 SIGNALING            |
| BEM1         | BOI2              | AFFINITY CAPTURE-MS      | CDC42 SIGNALING            |
| BEM1         | BOI2              | PHYSICAL INTERACTION     | CDC42 SIGNALING            |
| BEM1         | BOI2              | RECONSTITUTED COMPLEX    | CDC42 SIGNALING            |
| BEM1         | BOI2              | TWO HYBRID               | CDC42 SIGNALING            |
| BEM1         | FAR1              | AFFINITY CAPTURE-WESTERN | CDC42 SIGNALING            |
| BEM1         | FAR1              | AFFINITY CHROMATOGRAPHY  | CDC42 SIGNALING            |
| BEM1         | FAR1              | PHYSICAL INTERACTION     | CDC42 SIGNALING            |
| BEM1         | FAR1              | RECONSTITUTED COMPLEX    | CDC42 SIGNALING            |
| BEM1         | FAR1              | TWO HYBRID               | CDC42 SIGNALING            |
| BEM1         | RSR1              | AFFINITY CHROMATOGRAPHY  | CDC42 SIGNALING            |
| BEM1         | RSR1              | PHYSICAL INTERACTION     | CDC42 SIGNALING            |
| BEM1         | RSR1              | RECONSTITUTED COMPLEX    | CDC42 SIGNALING            |
| BEM3         | BEM4              | PHYSICAL INTERACTION     | CDC42 SIGNALING            |
| BEM3         | BEM4              | TWO HYBRID               | CDC42 SIGNALING            |
| CDC24        | BEM4              | PHYSICAL INTERACTION     | CDC42 SIGNALING            |
| CDC24        | BEM4              | TWO HYBRID               | CDC42 SIGNALING            |
| CDC24        | BOI1              | AFFINITY CAPTURE-MS      | CDC42 SIGNALING            |
| CDC24        | BOI1              | AFFINITY CAPTURE-WESTERN | CDC42 SIGNALING            |
| CDC24        | BOI2              | AFFINITY CAPTURE-MS      | CDC42 SIGNALING            |
| CDC24        | BOI2              | AFFINITY CAPTURE-WESTERN | CDC42 SIGNALING            |
| CDC24        | BOI2              | PHYSICAL INTERACTION     | CDC42 SIGNALING            |
| CDC24        | FAR1              | AFFINITY CAPTURE-WESTERN | CDC42 SIGNALING            |
| CDC24        | FAR1              | AFFINITY PRECIPITATION   | CDC42 SIGNALING            |
| CDC24        | FAR1              | PHYSICAL INTERACTION     | CDC42 SIGNALING            |
| CDC24        | FAR1              | RECONSTITUTED COMPLEX    | CDC42 SIGNALING            |
| CDC24        | FAR1              | TWO HYBRID               | CDC42 SIGNALING            |
| CDC24        | RSR1              | AFFINITY CAPTURE-WESTERN | CDC42 SIGNALING            |
| CDC24        | RSR1              | AFFINITY PRECIPITATION   | CDC42 SIGNALING            |
| CDC24        | RSR1              | PHYSICAL INTERACTION     | CDC42 SIGNALING            |

|       |       |                          |                      |
|-------|-------|--------------------------|----------------------|
| CDC24 | RSR1  | RECONSTITUTED COMPLEX    | CDC42 SIGNALING      |
| CDC24 | RSR1  | TWO HYBRID               | CDC42 SIGNALING      |
| CDC24 | TOS2  | PHYSICAL INTERACTION     | CDC42 SIGNALING      |
| CDC24 | TOS2  | TWO HYBRID               | CDC42 SIGNALING      |
| CDC42 | BEM4  | AFFINITY CAPTURE-MS      | CDC42 SIGNALING      |
| CDC42 | BEM4  | PHYSICAL INTERACTION     | CDC42 SIGNALING      |
| CDC42 | BEM4  | TWO HYBRID               | CDC42 SIGNALING      |
| CDC42 | BOI1  | PHYSICAL INTERACTION     | CDC42 SIGNALING      |
| CDC42 | BOI1  | TWO HYBRID               | CDC42 SIGNALING      |
| CDC42 | BOI2  | PHYSICAL INTERACTION     | CDC42 SIGNALING      |
| CDC42 | BOI2  | TWO HYBRID               | CDC42 SIGNALING      |
| CDC42 | FAR1  | PHYSICAL INTERACTION     | CDC42 SIGNALING      |
| CDC42 | FAR1  | TWO HYBRID               | CDC42 SIGNALING      |
| CDC42 | GIC1  | AFFINITY CAPTURE-WESTERN | CDC42 SIGNALING      |
| CDC42 | GIC1  | PHYSICAL INTERACTION     | CDC42 SIGNALING      |
| CDC42 | GIC1  | RECONSTITUTED COMPLEX    | CDC42 SIGNALING      |
| CDC42 | GIC1  | TWO HYBRID               | CDC42 SIGNALING      |
| CDC42 | GIC2  | AFFINITY CAPTURE-WESTERN | CDC42 SIGNALING      |
| CDC42 | GIC2  | PHYSICAL INTERACTION     | CDC42 SIGNALING      |
| CDC42 | GIC2  | RECONSTITUTED COMPLEX    | CDC42 SIGNALING      |
| CDC42 | GIC2  | TWO HYBRID               | CDC42 SIGNALING      |
| CDC42 | RSR1  | AFFINITY CAPTURE-WESTERN | CDC42 SIGNALING      |
| CDC42 | RSR1  | RECONSTITUTED COMPLEX    | CDC42 SIGNALING      |
| CDC42 | SKM1  | PHYSICAL INTERACTION     | CDC42 SIGNALING      |
| CLA4  | BOI2  | PHYSICAL INTERACTION     | CDC42 SIGNALING      |
| CLA4  | BOI2  | TWO HYBRID               | CDC42 SIGNALING      |
| CLA4  | GIC1  | PHYSICAL INTERACTION     | CDC42 SIGNALING      |
| CLA4  | GIC1  | TWO HYBRID               | CDC42 SIGNALING      |
| CLA4  | GIC2  | PHYSICAL INTERACTION     | CDC42 SIGNALING      |
| CLA4  | GIC2  | TWO HYBRID               | CDC42 SIGNALING      |
| CLA4  | SKM1  | AFFINITY CAPTURE-MS      | CDC42 SIGNALING      |
| RGA1  | GIC2  | PHYSICAL INTERACTION     | CDC42 SIGNALING      |
| RGA1  | GIC2  | TWO HYBRID               | CDC42 SIGNALING      |
| RGA2  | RSR1  | TWO HYBRID               | CDC42 SIGNALING      |
| BEM3  | APL6  | PHYSICAL INTERACTION     | EARLY SECRETION      |
| CLA4  | SEC23 | AFFINITY CAPTURE-MS      | EARLY SECRETION      |
| CDC24 | ENT2  | PHYSICAL INTERACTION     | ENDOCYTTIC RECYCLING |
| CDC24 | ENT2  | TWO HYBRID               | ENDOCYTTIC RECYCLING |
| RGA1  | ENT1  | AFFINITY CAPTURE-WESTERN | ENDOCYTTIC RECYCLING |
| RGA2  | ENT1  | AFFINITY CAPTURE-WESTERN | ENDOCYTTIC RECYCLING |
| BEM1  | SEC10 | RECONSTITUTED COMPLEX    | LATE SECRETION       |
| BEM1  | SEC15 | AFFINITY CAPTURE-WESTERN | LATE SECRETION       |
| BEM1  | SEC15 | PHYSICAL INTERACTION     | LATE SECRETION       |
| BEM1  | SEC15 | RECONSTITUTED COMPLEX    | LATE SECRETION       |
| BEM1  | SEC15 | TWO HYBRID               | LATE SECRETION       |
| BEM1  | SEC5  | PCA                      | LATE SECRETION       |
| BEM1  | SEC5  | RECONSTITUTED COMPLEX    | LATE SECRETION       |
| BEM1  | SEC8  | AFFINITY CAPTURE-WESTERN | LATE SECRETION       |
| CDC24 | SEC15 | PHYSICAL INTERACTION     | LATE SECRETION       |
| CDC24 | SEC15 | TWO HYBRID               | LATE SECRETION       |
| CDC42 | MSB3  | RECONSTITUTED COMPLEX    | LATE SECRETION       |
| CDC42 | MSB4  | RECONSTITUTED COMPLEX    | LATE SECRETION       |

|       |       |                          |                |
|-------|-------|--------------------------|----------------|
| CDC42 | SEC3  | PHYSICAL INTERACTION     | LATE SECRETION |
| CDC42 | SEC3  | RECONSTITUTED COMPLEX    | LATE SECRETION |
| CLA4  | SEC23 | AFFINITY CAPTURE-MS      | LATE SECRETION |
| RGA1  | MLC1  | AFFINITY CAPTURE-MS      | LATE SECRETION |
| BEM1  | CDC24 | AFFINITY CAPTURE-MS      | CDC42 Module   |
| BEM1  | CDC24 | AFFINITY CAPTURE-WESTERN | CDC42 Module   |
| BEM1  | CDC24 | AFFINITY PRECIPITATION   | CDC42 Module   |
| BEM1  | CDC24 | PCA                      | CDC42 Module   |
| BEM1  | CDC24 | PHYSICAL INTERACTION     | CDC42 Module   |
| BEM1  | CDC24 | PROTEIN-PEPTIDE          | CDC42 Module   |
| BEM1  | CDC24 | RECONSTITUTED COMPLEX    | CDC42 Module   |
| BEM1  | CDC24 | TWO HYBRID               | CDC42 Module   |
| BEM1  | CDC42 | AFFINITY CAPTURE-WESTERN | CDC42 Module   |
| BEM1  | CDC42 | PHYSICAL INTERACTION     | CDC42 Module   |
| BEM1  | CDC42 | RECONSTITUTED COMPLEX    | CDC42 Module   |
| BEM1  | CDC42 | TWO HYBRID               | CDC42 Module   |
| BEM1  | CLA4  | AFFINITY CAPTURE-WESTERN | CDC42 Module   |
| BEM1  | RGA2  | AFFINITY CAPTURE-MS      | CDC42 Module   |
| BEM3  | CDC42 | TWO HYBRID               | CDC42 Module   |
| BEM3  | CLA4  | PHYSICAL INTERACTION     | CDC42 Module   |
| BEM3  | CLA4  | TWO HYBRID               | CDC42 Module   |
| CDC24 | CDC42 | AFFINITY CAPTURE-WESTERN | CDC42 Module   |
| CDC24 | CDC42 | AFFINITY PRECIPITATION   | CDC42 Module   |
| CDC24 | CDC42 | PHYSICAL INTERACTION     | CDC42 Module   |
| CDC24 | CDC42 | RECONSTITUTED COMPLEX    | CDC42 Module   |
| CDC24 | CDC42 | TWO HYBRID               | CDC42 Module   |
| CDC24 | CLA4  | AFFINITY CAPTURE-WESTERN | CDC42 Module   |
| CDC24 | RGA2  | AFFINITY CAPTURE-MS      | CDC42 Module   |
| CDC24 | RGA2  | AFFINITY CAPTURE-WESTERN | CDC42 Module   |
| CDC42 | CDC24 | AFFINITY CAPTURE-WESTERN | CDC42 Module   |
| CDC42 | CDC24 | AFFINITY PRECIPITATION   | CDC42 Module   |
| CDC42 | CDC24 | PHYSICAL INTERACTION     | CDC42 Module   |
| CDC42 | CDC24 | RECONSTITUTED COMPLEX    | CDC42 Module   |
| CDC42 | CDC24 | TWO HYBRID               | CDC42 Module   |
| CDC42 | CLA4  | AFFINITY CAPTURE-WESTERN | CDC42 Module   |
| CDC42 | CLA4  | PHYSICAL INTERACTION     | CDC42 Module   |
| CDC42 | CLA4  | RECONSTITUTED COMPLEX    | CDC42 Module   |
| CDC42 | CLA4  | TWO HYBRID               | CDC42 Module   |
| CDC42 | RDI1  | AFFINITY CAPTURE-WESTERN | CDC42 Module   |
| CDC42 | RDI1  | AFFINITY PRECIPITATION   | CDC42 Module   |
| CDC42 | RDI1  | FRET                     | CDC42 Module   |
| CDC42 | RDI1  | PHYSICAL INTERACTION     | CDC42 Module   |
| CDC42 | RDI1  | TWO HYBRID               | CDC42 Module   |
| CDC42 | RGA1  | PHYSICAL INTERACTION     | CDC42 Module   |
| CDC42 | RGA1  | RECONSTITUTED COMPLEX    | CDC42 Module   |
| CDC42 | RGA1  | TWO HYBRID               | CDC42 Module   |
| CDC42 | RGA2  | TWO HYBRID               | CDC42 Module   |
| CLA4  | RGA1  | PHYSICAL INTERACTION     | CDC42 Module   |
| CLA4  | RGA1  | TWO HYBRID               | CDC42 Module   |

**Supplementary Table S3. FRAP values**

| <b>Strain</b>                      | <b>N</b> | <b>T/2</b> | <b>SEM</b> |
|------------------------------------|----------|------------|------------|
| Cdc42 (end)                        | 24       | 2.03       | 0.15       |
| Cdc42 (ect)                        | 56       | 2.19       | 0.08       |
| Cdc42 (2xect)                      | 10       | 2.32       | 0.16       |
| Cdc42 (end) + LatB                 | 11       | 2.77       | 0.12       |
| Cdc42 (ect) + LatB                 | 24       | 2.55       | 0.07       |
| Cdc42 (2xect) + LatB               | 12       | 3.26       | 0.25       |
| $\Delta rdi1$ Cdc42 (ect)          | 20       | 10.56      | 0.45       |
| Cdc42 <sup>R66E</sup>              | 11       | 9.14       | 0.66       |
| $\Delta bem2$ Cdc42 (ect)          | 20       | 6.65       | 0.39       |
| $\Delta bem2$ Cdc42 (ect) + LatB   | 12       | 9.61       | 0.57       |
| Cdc42 <sup>G12V</sup>              | 16       | 33.44      | 2.20       |
| Cdc42 <sup>D57Y</sup>              | 16       | 11.93      | 0.68       |
| Cdc42 <sup>G60A</sup>              | 11       | 6.76       | 0.40       |
| Cdc24 (end)                        | 10       | 2.12       | 0.14       |
| Cdc24 (ect)                        | 20       | 2.10       | 0.15       |
| Cdc24 (2xect)                      | 11       | 2.22       | 0.14       |
| Cdc24 (ect) + LatB                 | 14       | 2.17       | 0.12       |
| Cdc24 (2xect) + LatB               | 17       | 2.05       | 0.09       |
| $\Delta bem2$ Cdc24 (ect)          | 10       | 2.06       | 0.15       |
| $\Delta bem2$ Cdc24 (2xect)        | 10       | 2.26       | 0.18       |
| $\Delta bem2$ Cdc24 (2xect) + LatB | 11       | 1.96       | 0.10       |

**Supplementary Table S4. Double buds**

| Strain                                     | LatB <sup>*</sup> | N    | % 2 buds | SD  |
|--------------------------------------------|-------------------|------|----------|-----|
| Cdc42 (ect)                                | /                 | 300  | 0.0      | 0.0 |
|                                            | a                 | 300  | 0.0      | 0.0 |
|                                            | b                 | 300  | 0.7      | 0.6 |
| Cdc42 (2xect)                              | /                 | 500  | 0.0      | 0.0 |
|                                            | a                 | 300  | 0.0      | 0.0 |
|                                            | b                 | 300  | 0.3      | 0.6 |
| Cdc42 (ect)+ Cdc24OE                       | /                 | 900  | 0.0      | 0.0 |
|                                            | a                 | 300  | 0.0      | 0.0 |
|                                            | b                 | 300  | 0.0      | 0.0 |
| GFP-Cdc42F28L                              | /                 | 500  | 0.0      | 0.0 |
|                                            | a                 | 300  | 0.0      | 0.0 |
|                                            | b                 | 300  | 0.0      | 0.0 |
| $\Delta$ <i>rdi1</i> Cdc42 (ect)           | /                 | 400  | 2.3      | 0.5 |
|                                            | a                 | 300  | 13.0     | 1.0 |
|                                            | b                 | 300  | 23.0     | 0.6 |
| $\Delta$ <i>bem2</i> (no tag)              | /                 | 200  | 7.0      | 1.4 |
|                                            | a                 | 300  | 14.0     | 1.5 |
|                                            | b                 | 300  | 25.0     | 1.5 |
| $\Delta$ <i>bem2</i> Cdc42 (ect)           | /                 | 600  | 8.7      | 0.8 |
|                                            | a                 | 300  | 13.0     | 1.5 |
|                                            | b                 | 300  | 25.0     | 0.6 |
| $\Delta$ <i>bem2</i> Cdc42 (2xect)         | /                 | 500  | 9.8      | 1.5 |
|                                            | a                 | 300  | 17.0     | 1.2 |
|                                            | b                 | 300  | 26.0     | 1.5 |
| $\Delta$ <i>bem2</i> Cdc42 (ect) + Cdc24OE | /                 | 900  | 12.0     | 1.3 |
|                                            | a                 | 300  | 24.0     | 1.5 |
|                                            | b                 | 300  | 30.0     | 2.6 |
| $\Delta$ <i>bem2</i> GFP-Cdc42F28L         | /                 | 500  | 25.0     | 1.5 |
|                                            | a                 | 300  | 55.0     | 0.6 |
|                                            | b                 | 300  | 63.0     | 3.1 |
| Cdc24-GFP (ect)                            | /                 | 700  | 0.0      | 0.0 |
|                                            | a                 | 300  | 0.0      | 0.0 |
|                                            | b                 | 300  | 0.0      | 0.0 |
| 2xCdc24-GFP (2xect)                        | /                 | 700  | 0.0      | 0.0 |
|                                            | a                 | 300  | 0.0      | 0.0 |
|                                            | b                 | 300  | 0.0      | 0.0 |
| $\Delta$ <i>bem2</i> Cdc24-GFP (ect)       | /                 | 1000 | 10.0     | 1.3 |
|                                            | a                 | 300  | 21.0     | 1.0 |
|                                            | b                 | 300  | 28.0     | 2.0 |
| $\Delta$ <i>bem2</i> 2x Cdc24-GFP (2xect)  | /                 | 600  | 19.0     | 1.5 |
|                                            | a                 | 300  | 26.0     | 1.0 |
|                                            | b                 | 300  | 26.0     | 2.1 |

\* /: no washout, a: washout after 20 min LatB, b: washout after 40 min LatB



**Supplementary Table S5.** Yeast strains

| Strain  | Genotype*                                                                                       | Source/Reference |
|---------|-------------------------------------------------------------------------------------------------|------------------|
| RWS116  | MATa <i>cln1::HisG cln2Δ cln3::HisG YipLac204-MET-CLN2::TRP1 ura3 his3-11,15 ade2-1can1-100</i> | <sup>60</sup>    |
| RWS119  | pGal-myc-GFP-CDC42::URA3 (RWC108)                                                               | this study       |
| RWS794  | pCDC24-CDC24-GFP::hphNT1                                                                        | this study       |
| RWS1023 | pCDC42-myc-GFP-CDC42 <sup>D57Y</sup> ::URA3 (RWC686)                                            | this study       |
| RWS1024 | pCDC42-myc-GFP-CDC42 <sup>R66E</sup> ::URA3 (RWC689)                                            | this study       |
| RWS1028 | <i>Δbem2::G418</i>                                                                              | this study       |
| RWS1029 | <i>Δbem2::G418</i> pCDC24-CDC24-GFP::LEU2 (RWC153)                                              | this study       |
| RWS1031 | <i>Δbem2::G418</i> pCDC42-myc-GFP-CDC42::URA3 (RWC108)<br>p42-GFP-Cdc42::LEU2 (RWC151)          | this study       |
| RWS1034 | pCDC42-GFP-CDC42::cloNAT                                                                        | this study       |
| RWS1035 | <i>Δbem2::G418</i> pCDC42-myc-GFP-CDC42::URA3 (RWC108)                                          | this study       |
| RWS1036 | pCDC42-myc-GFP-CDC42 <sup>G60A</sup> ::URA3 (RWC688)                                            | this study       |
| RWS1037 | pCDC42-myc-GFP-CDC42 <sup>G12V</sup> ::URA3 (RWC687)                                            | this study       |
| RWS1038 | <i>Δvps27::G418</i> pCDC42-myc-GFP-CDC42::URA3 (RWC108)                                         | this study       |
| RWS1039 | <i>Δrdi1::LEU2 Δvps27::G418</i> pCDC42-myc-GFP-CDC42::URA3 (RWC108)                             | this study       |
| RWS1040 | pCDC24-CDC24-GFP::LEU2 (RWC153) pCDC24-CDC24-GFP::URA(RWC146)                                   | this study       |
| RWS1041 | <i>Δbem2::G418</i> pCDC24-CDC24-GFP::LEU2 (RWC153)<br>pCDC24-CDC24-GFP::URA(RWC146)             | this study       |
| RWS1047 | <i>myo2-16</i> pCDC42-myc-GFP-CDC42::URA3 (RWC108)                                              | this study       |
| RWS1048 | <i>myo2-16 Δrdi1::LEU2</i> pCDC42-myc-GFP-CDC42::URA3 (RWC108)                                  | this study       |
| RWS1088 | pCDC42-myc-GFP-CDC42::URA(RWC108)<br>pCdc24Cdc24mRFP-Ruby::LEU2 (RWC723)                        | this study       |
| RWS1099 | pCDC42-myc-GFP-CDC42::URA3(RWC108) p42-GFP-Cdc42::LEU2 (RWC151)                                 | this study       |
| RWS1135 | pCDC42-myc-GFP-CDC42 <sup>F28L</sup> ::URA3 (RWC790)                                            | this study       |
| RWS1136 | <i>Δbem2::G418</i> pCDC42-myc-GFP-CDC42 <sup>F28L</sup> ::URA3 (RWC790)                         | this study       |
| RWS1421 | pCDC42-myc-GFP-CDC42::URA3 (RWC108)                                                             | this study       |
| RWS1422 | pCDC24-CDC24::LEU2 (RWC153)                                                                     | this study       |
| RWS1423 | <i>Δrdi1::LEU2</i> pCDC42-myc-GFP-CDC42::URA3 (RWC108)                                          | this study       |
| RWS1424 | <i>Δbem2::G418</i> pCDC42-myc-GFP-CDC42::URA(RWC108)<br>pCdc24Cdc24mRFP-Ruby::LEU2 (RWC723)     | this study       |

\*all strains were made in the RWS 116 background

**Supplementary Table S6. Plasmids**

| Plasmid | Origin | Description                                                                                                                                             | Source/Reference |
|---------|--------|---------------------------------------------------------------------------------------------------------------------------------------------------------|------------------|
| RWC21   | pRS306 | GFP-CDC42 under the control of Gal promoter in a pRS306 backbone for integration into the URA3 locus after linearization                                | <sup>14</sup>    |
| RWC108  | pRS306 | GFP-CDC42 under the control of the endogenous CDC42-promoter in a pRS306 backbone for integration into the URA3 locus after linearization               | <sup>14</sup>    |
| RWC146  | pRS316 | CDC24-GFP under the control of the endogenous CDC24-promoter in a pRS316 backbone URA3-CEN plasmid                                                      | this study       |
| RWC148  | pRS305 | pRS305 backbone for integration into the LEU2 locus after linearization                                                                                 | this study       |
| RWC151  | pRS305 | GFP-CDC42 under the control of the endogenous CDC42-promoter in a pRS305 backbone for integration into the LEU2 locus after linearization               | this study       |
| RWC153  | pRS305 | CDC24-GFP under the control of the endogenous CDC24-promoter in a pRS305 backbone for integration into the LEU2 locus after linearization               | <sup>14</sup>    |
| RWC233  | pYM-25 | Plasmid for C-terminal direct tagging, hphNT1.                                                                                                          | <sup>56</sup>    |
| RWC257  | pYM-N4 | Plasmid for N-terminal direct tagging, clonNAT.                                                                                                         | <sup>56</sup>    |
| RWC550  | pYM-N4 | Plasmid for N-terminal direct tagging, clonNAT under the control of the endogenous CDC42 promoter                                                       | <sup>56</sup>    |
| RWC686  | pRS306 | GFP-CDC42D57Y under the control of the endogenous CDC42-promoter in a pRS306 backbone for integration into the URA3 locus after linearization           | this study       |
| RWC687  | pRS306 | GFP-CDC42G12V CDC42D57Y under the control of the endogenous CDC42-promoter in a pRS306 backbone for integration into the URA3 locus after linearization | this study       |
| RWC688  | pRS306 | GFP-CDC42G60A CDC42D57Y under the control of the endogenous CDC42-promoter in a pRS306 backbone for integration into the URA3 locus after linearization | this study       |
| RWC689  | pRS306 | GFP-CDC42R66E CDC42D57Y under the control of the endogenous CDC42-promoter in a pRS306 backbone for integration into the URA3 locus after linearization | this study       |
| RWC723  | pRS305 | CDC24-mRFP CDC42D57Y under the control of the endogenous CDC24-promoter in a pRS305 backbone for integration into the LEU2 locus after linearization    | this study       |
| RWC790  | pRS306 | GFP-CDC42F28L under the control of the endogenous CDC42-promoter in a pRS306 backbone for integration into the URA3 locus after linearization           | this study       |

**Supplementary Table S7. Primer**

| Primer  | Sequence 5'→3'                                                             | use                             |
|---------|----------------------------------------------------------------------------|---------------------------------|
| RWS650  | AGCAAAACTTATAAAACAAGAAATAAACGTATTAGCTCT<br>TCCACAAAATGcgtacgctgcaggtcgac*  | Cdc42 genomic GFP integration   |
| RWS651  | CACGTTTTCCCAACAGCACCATCACCGACAACAACACAC<br>TTTAGCGTTTGCatgatgaattctctgctg  | Cdc42 genomic GFP integration   |
| RWS618  | TCCGGATTTGTGGAAGAGCTAATACGTTTATTTC                                         | Cdc42 promoter with BspEI       |
| RWS617  | GAGCTCCAGGCCGGAAC TCAAAGG                                                  | Cdc42 promoter with SacI        |
| RWS655  | AAGAAATGTTGGCGGAAAACAATGAGAAATCTTGAAC<br>ATTCGCTGTAT cgtacgctgcaggtcgac    | Cdc24 genomic GFP integration   |
| RWS654  | GTTTTTTCTTGAATTATTTAGTATTTGCTGTATACTAGTT<br>TTATTTATCA atcgatgaattcgagctcg | Cdc24 genomic GFP integration   |
| RWS347  | AGGCAAGAGATCAGGCGGAAAGA                                                    | amplification of KanMX-cassette |
| RWS346  | AGAAGCAAGCTACGTTGCAGCCA                                                    | amplification of KanMX-cassette |
| RWS885  | CAGGTTTCATTGGAGGTGC                                                        | Bem2 deletion test primer       |
| RWS265  | GGTGCTCAACAATTCAGTTCT                                                      | Bem2 deletion test primer       |
| RWS352  | TGCACCAACATACCGTTTTGC                                                      | Bem2 deletion test primer       |
| RWS351  | TGATGGTAAATCCCCTCCTGC                                                      | Bem2 deletion test primer       |
| RWS98   | CACGGAGCCTACCTTTTAG                                                        | Vps27 deletion test primer      |
| RWS97   | GTTCGTGTGGTTAGACAAC                                                        | Vps27 deletion test primer      |
| RWS207  | TGATGCTTTGTAGCTGTTGCTC                                                     | Vps27 deletion test primer      |
| RWS206  | AGAGAAGCTGAAGAAGCGAAGC                                                     | Vps27 deletion test primer      |
| RWS343  | TGAAATGCTTCTGAGCGAAGC                                                      | Vps27 deletion test primer      |
| RWS342  | TCAAATGCCTTGCTGACCACT                                                      | Vps27 deletion test primer      |
| RWS1112 | GAGCGCAACGCAATTAATG                                                        | Cdc42 amplification from RWC 21 |
| RWS73   | CTGCCCTTTCGAAAGATC                                                         | Cdc42 amplification from RWC 21 |
| RWS1110 | GATATGACAAGGGTCTCAATTCATCGTAATCTTGTGACC<br>G                               | R66E mutation primer            |
| RWS1109 | GAAGATTACGATGAATTGAGACCCTTGTCATATC                                         | R66E mutation primer            |
| RWS1112 | GAGCGCAACGCAATTAATG                                                        | Cdc42 amplification from RWC 21 |
| RWS73   | CTGCCCTTTCGAAAGATC                                                         | Cdc42 amplification from RWC 21 |
| RWS1540 | GGAACATAGTCGGCTGGCAATTGATTGTTGTATAG                                        | F28L mutation primer            |
| RWS1539 | CTATACAACGAATCAATTGCCAGCCGACTATGTTC                                        | F28L mutation primer            |
| RWS48   | GTATTCTGGGCTCCATG                                                          | KanMX test primer               |
| RWS47   | GATACTAACGCCCCATC                                                          | KanMX test primer               |
| RWS1247 | TGAGCTGCGCACGTCAAG                                                         | KanMX test primer               |
| RWS1246 | TGGTCGCTATACTGCTGTC                                                        | KanMX test primer               |

\* restriction endonuclease sites are underlined; homology regions for direct integration are depicted in small letters

**Supplementary Table S8: Model reactions**

| Reaction                | Formula                                                                                                               |
|-------------------------|-----------------------------------------------------------------------------------------------------------------------|
| Membrane diffusion      | $T_i \xrightarrow{k_D} T_{i\pm 1}, D_i \xrightarrow{k_D} D_{i\pm 1}$                                                  |
| Hydrolysis              | $T_i \xrightarrow{a} D_i$                                                                                             |
| Nucleotide exchange     | $D_i \xrightarrow{b_1 T_i / (c_{th} + \sum_j T_j) + b_2} T_i$                                                         |
| Recruitment             | $D_{cyt} \xrightarrow{c_1 T_i / (c_{th} + \sum_j T_j)} T_i,$<br>$D_{cyt} \xrightarrow{c_2} D_i$                       |
| Extraction              | $D_i \xrightarrow{d} D_{cyt}$                                                                                         |
| Actin bundle nucleation | $A_{cyt} \xrightarrow{e T_i} A_i$                                                                                     |
| Exocytosis              | $T_{IM} \xrightarrow{f[A_i + (h - \sum_j A_j)/n]/h} T_i,$<br>$D_{IM} \xrightarrow{f[A_i + (h - \sum_j A_j)/n]/h} D_i$ |
| Endocytosis             | $T_i \xrightarrow{g} T_{IM}, D_i \xrightarrow{g} D_{IM}$                                                              |

**Supplementary Table S9. Model parameters**

| <b>parameter</b> | <b>value</b>                   | <b>description</b>                                                                                                                                                                  |
|------------------|--------------------------------|-------------------------------------------------------------------------------------------------------------------------------------------------------------------------------------|
| $n$              | 100                            | number of lattice sites                                                                                                                                                             |
| $R$              | 3.95 $\mu\text{m}$             | cell radius; from this work                                                                                                                                                         |
| $D$              | 0.036 $\mu\text{m}^2/\text{s}$ | diffusion constant (Marco et al., 2007)                                                                                                                                             |
| $k_D$            | 0.585/s                        | corresponding model reaction rate                                                                                                                                                   |
| $N_{42}$         | 3000                           | Cdc42 per cell; estimate obtained by comparing the fraction of Cdc42 in the cytosol and the total amount of GDI per cell (Ghaemmaghami et al., 2003; Wedlich-Soeldner et al., 2004) |
| $N_A$            | 2                              | number of assumed possible actin bundle nucleation sites                                                                                                                            |
| $a$              | 2.74/s                         | hydrolysis rate; fitted to provide latrunculin treated control cell properties                                                                                                      |
| $b_1$            | 63.1/s                         | GEF-mediated nucleotide exchange rate; fitted to provide properties of LatB treated control cells                                                                                   |
| $b_2$            | 0.0002/s                       | intrinsic nucleotide exchange rate (Zheng et al. JBC, 1994)                                                                                                                         |
| $c_1$            | 0.04472/s                      | GEF-mediated membrane attachment rate of cytosolic Cdc42; fitted to provide properties of LatB treated control cells                                                                |
| $c_2$            | 0.0015/s                       | basal membrane attachment rate of cytosolic Cdc42; fitted to provide properties of LatB treated control cells                                                                       |
| $d$              | 0.5/s                          | Cdc42-GDP extraction rate; estimated from Cdc42 FRAP in this work                                                                                                                   |
| $e$              | 0.000139/s                     | actin bundle nucleation rate; fitted to provide properties of $\Delta rdi1$ cells                                                                                                   |
| $f$              | 0.02236/s                      | rate describing the total exocytosis of Cdc42 to the membrane; fitted to provide properties of $\Delta rdi1$ cells                                                                  |
| $h$              | 4                              | parameter defining rate of background exocytosis of Cdc42; fitted to provide properties of $\Delta rdi1$ cells                                                                      |
| $g$              | 0.04472/s                      | endocytosis rate; fitted to provide properties of $\Delta rdi1$ cells                                                                                                               |
| $c_{th}$         | 100                            | threshold of bounded feedback; estimate based on the approximate amount of Cdc42 in the polarity cluster                                                                            |

**Supplementary Table S10 Comparison of features and limitations in models for yeast cell polarity**

| <b>paper</b>                    | <b>type of model</b>                                                                                                                                                                                                                                                                                                                                                                                         | <b>level of detail</b> | <b>mathematical complexity</b> | <b>step of polarity</b> |
|---------------------------------|--------------------------------------------------------------------------------------------------------------------------------------------------------------------------------------------------------------------------------------------------------------------------------------------------------------------------------------------------------------------------------------------------------------|------------------------|--------------------------------|-------------------------|
| Wedlich-Soldner, 2003 (ref. 13) | stochastic                                                                                                                                                                                                                                                                                                                                                                                                   | conceptual             | low                            | establishment           |
|                                 | Conceptual model that does not include realistic descriptions of Cdc42 diffusion or endocytosis. Biological predictions are kept very general. Only active Cdc42 is considered.                                                                                                                                                                                                                              |                        |                                |                         |
| Marco, 2007 (ref. 37)           | deterministic                                                                                                                                                                                                                                                                                                                                                                                                | mechanistic            | low, 1 PDE                     | maintenance             |
|                                 | Includes detailed measurements for lateral diffusion, endocytosis and secretion of Cdc42. Concludes that endocytosis is optimized for sharpness of polarization. Uses coarse-grained model for actin-mediated transport steps. Mainly considers active Cdc42.                                                                                                                                                |                        |                                |                         |
| Goryachev, 2008 (ref. 28)       | deterministic                                                                                                                                                                                                                                                                                                                                                                                                | mechanistic            | high, 8 PDEs                   | establishment           |
|                                 | Reaction-diffusion system where mass conservation enforces formation of a single stable cluster from multiple intermediates by coarsening. Very detailed model of the Cdc42 GTPase cycle. Includes several biochemical parameters that are not experimentally validated, such as Cdc42-GTP-dependent GEF turnover, which does not fit our own results (see text for details).                                |                        |                                |                         |
| Altschuler, 2008 (ref.30)       | stochastic                                                                                                                                                                                                                                                                                                                                                                                                   | conceptual             | low                            | establishment           |
|                                 | Linear positive feedback provides stochastic clustering at low protein number. Due to their stochastic nature clusters are only transient. Very simple model, which only requires a single positive feedback. Model predictions are not validated by experimental results.                                                                                                                                   |                        |                                |                         |
| Slaughter, 2009 (ref. 17)       | deterministic                                                                                                                                                                                                                                                                                                                                                                                                | mechanistic            | intermediate, several PDEs     | maintenance             |
|                                 | Combines GDI- and actin-mediated recycling pathways for Cdc42. Provides detailed measurements and parameters for uptake and delivery of Cdc42. Makes quantitative predictions. Concludes that endocytosis and GDI-mediated Cdc42 internalization are optimized for a particular shape of polarization in budding vs. mating cells. Does not consider symmetry breaking / polarity establishment.             |                        |                                |                         |
| Howell, 2009 (ref. 46)          | deterministic                                                                                                                                                                                                                                                                                                                                                                                                | mechanistic            | high                           | maintenance             |
|                                 | Uses model by Goryatchev 2008 to predict formation of multiple buds through failure of competition in a reaction-diffusion system. Does not consider relevance of actin for formation of multiple buds. Ambiguous localization of chimeric constructs makes interpretation difficult (Bem1-t-SNARE fusion induces formation of multiple buds and simultaneously localizes to bud scar and cortical patches). |                        |                                |                         |

| <b>paper</b>              | <b>type of model</b>                                                                                                                                                                                                                                                                                                                                                                                                                                                                                                                                                                         | <b>level of detail</b> | <b>mathematical complexity</b> | <b>step of polarity</b> |
|---------------------------|----------------------------------------------------------------------------------------------------------------------------------------------------------------------------------------------------------------------------------------------------------------------------------------------------------------------------------------------------------------------------------------------------------------------------------------------------------------------------------------------------------------------------------------------------------------------------------------------|------------------------|--------------------------------|-------------------------|
| Layton, 2011<br>(ref.25)  | stochastic                                                                                                                                                                                                                                                                                                                                                                                                                                                                                                                                                                                   | mechanistic            | high                           | maintenance             |
|                           | <p>Model of actin-dependent polarization of Cdc42 that explicitly considers vesicular intermediates of endo- and exocytosis. Predicts that polarization via actin cannot occur with previously measured diffusion constants for Cdc42.</p> <p>Introduces several parameters for endocytic recycling that have not been experimentally validated. Cannot explain formation of multiple buds.</p> <p>Makes simplifying assumptions on kinetics of lipids and proteins during vesicle fusion (lipids are likely to diffuse much faster, which would oppose the postulated dilution effect).</p> |                        |                                |                         |
| Savage, 2012<br>(ref. 21) | stochastic                                                                                                                                                                                                                                                                                                                                                                                                                                                                                                                                                                                   | mechanistic            | high                           | maintenance             |
|                           | <p>Combines models of Howell 2009 and Layton 2011. Questions the contribution of actin to Cdc42 recycling and polarity establishment. Ignores the previously documented ability of yeast cells to polarize independently of Bem1 and exclusively via actin-mediated transport. The prediction of increased Cdc42 cap intensity after treatment with LatB is not validated by our experiments (see text).</p>                                                                                                                                                                                 |                        |                                |                         |
| Howell, 2012<br>(ref. 24) | deterministic                                                                                                                                                                                                                                                                                                                                                                                                                                                                                                                                                                                | mechanistic            | high                           | maintenance             |
|                           | <p>Extends model in Howell 2009 by negative feedback. Shows oscillating cortical patches.</p> <p>Synchronization with hydroxyurea yields cells with ill-defined cell cycle stage and Cdc42 regulation. Oscillation is not observed in unpolarized, cyclin-depleted cells arrested at the G1-S transition. Does not provide explanations for double budded cells. Results can therefore not be directly compared.</p>                                                                                                                                                                         |                        |                                |                         |
| Freisinger (this work)    | stochastic                                                                                                                                                                                                                                                                                                                                                                                                                                                                                                                                                                                   | mechanistic            | intermediate                   | establishment           |
|                           | <p>First stochastic model for combined GDI and actin-mediated Cdc42 recycling. Combination of pathways confers uniqueness, speed and robustness of polarization response. Model kept as simple as possible and only includes experimentally validated parameters. Coarse graining of the actin-mediated pathway is currently necessary as more detailed parameters cannot be reliably measured.</p>                                                                                                                                                                                          |                        |                                |                         |

### 3. Supplementary Methods

**Effects of Cdc42 expression level on polarization efficiency** Fig. S1a: Cells expressing GM-Cdc42 (Cdc42 N-terminally tagged with GFP and Myc<sub>6</sub>) from the *CDC42* promoter or a galactose-inducible promoter were grown overnight in SC-methionine and 2% glucose, washed three times with distilled water, diluted into SC-methionine containing 2% raffinose, and then arrested for 3 h in G1 in YPD supplemented with 2 % raffinose and 3 mM methionine. Cells expressing GM-Cdc42 from the *GAL* promoter were induced for either 30 min or 90 min by addition of 2% galactose. To disrupt the actin cytoskeleton, cells were treated with 150  $\mu$ M LatA during release from G1. Polarized cells were counted after 30 min and 60 min (cells expressing GM-Cdc42 under the *CDC42* promoter) and after 30 min and 90 min (galactose-induced cells). Expression levels of GM-Cdc42 were determined by integrating fluorescence intensity for each cell.

**Growth Assay** Logarithmically growing cells were grown to an OD<sub>600</sub> of 0.3, diluted 10 fold with medium and transferred to a 96-well flat-bottom plate (Corning). Growth rates were measured every 5 min at 30°C and OD<sub>620</sub> with a Multiscan FC 96-well reader (Thermo Scientific). Measurements of each strain were done in triplicates. Growth curves were analysed and fitted with Prism 4.0 (Graphpad).

**Fluorescent Intensity measurements** Fluorescent intensities of logarithmically growing cells were measured using an INCell Analyzer 2000 (GE Healthcare) equipped with a 40x/0.6 air objective. Images of living yeast cells were automatically acquired from several positions per well with exposure times of 50 ms for the brightfield channel, 1800 ms for GFP fluorescence and 500 ms for RFP fluorescence using appropriate filter sets. 25 images with >100 cells were acquired per strain and channel and quantified using INCell Analyzer Workstation v3.7 software.

**Nucleotide exchange assay** Competition between GDI and the guanine nucleotide exchange factor Dock180 was measured with prenylated Rac1. Rac1 was preloaded with Mant-GDP in a 25- $\mu$ l volume in the presence of 20  $\mu$ l of unlabeled 1- $\mu$ m liposomes. After transferring the mixture (containing 60 nM Rac1 and 500 nM Mant GDP) to the cuvette, unlabeled GTP (10  $\mu$ M) and GDI (80 nM) were added for 10 min. At the indicated times, different concentrations of the DHR2 domain of Dock180 were added. Traces monitored the loss of Mant fluorescence due to nucleotide exchange.



For radioactive Rac1-liposome association assays, Rac1 (40 nM) was preloaded with  $\alpha[^{32}\text{P}]\text{GTP}$  (2300 cpm/pmol, 10  $\mu\text{M}$ ) by EDTA (8 mM)-stimulated nucleotide exchange in the presence of 8  $\mu\text{m}$  liposomes (1 mg/ml). Rac1 was allowed to hydrolyze bound nucleotide to  $\alpha[^{32}\text{P}]\text{GDP}$  for 30 min on ice in presence of excess magnesium (14 mM). This also prevented further EDTA-stimulated nucleotide exchange. The protein was then incubated with 45 nM GDI for 10 min, followed by 10 min with the DHR2 domain of Dock180 (500 nM) in the presence of 100  $\mu\text{M}$  unlabeled  $\text{GTP}\gamma\text{S}$ . The mixture was pelleted for 10 min at  $16,000\times g$ , and radioactivity levels in the supernatant and pellet fractions were measured.

**Stochastic model of cell polarity.** We built a stochastic particle-based model and simulated the emergence of polarity in budding yeast. Our model explicitly includes as variables the active ( $T$ ) and inactive ( $D$ ) forms of Cdc42, which can be recruited to the plasma membrane and accumulate in caps. A pool of Cdc42 ( $T_{IM}$ ,  $D_{IM}$ ) can be found on internal membranes ( $IM$ ) and is allowed to shuttle between plasma membrane and internal membranes via endocytosis and exocytosis. Cdc42 can also be extracted from the plasma membrane directly into a well-mixed pool of cytosolic Cdc42-GDP ( $D_{cyt}$ ) by interaction with its GDI, Rdi1. We considered a two-dimensional model of a circular shaped cell with radius  $R$ . The membrane was split into  $n = 100$  segments where reactions take place between particles on the same segment  $i = 1, \dots, n$ . This approach allowed us to stochastically simulate the temporal evolution of the system using the Gillespie algorithm<sup>61</sup>.

We fitted our model to recapitulate the emergence of Cdc42 caps in latrunculin-treated and in  $\Delta rdi1$  cells, and tested its reliability by comparing the predictions of the combined model with our experimental results derived from wild-type cells and mutants altered in GTP hydrolysis.

To achieve and maintain polarization, Cdc42 must be continuously returned to the cap, as diffusion in the plasma membrane acts to flatten any inhomogeneities in protein distribution. We incorporated diffusion of Cdc42 in the plasma membrane as jumps between neighbouring segments with the stochastic rate constant  $k_D$ . The rate can be calculated from  $k_D = D / (2\pi R / n)^2$ , where  $D$  is the diffusion constant and  $R$  the cell radius<sup>62</sup>.

The intrinsic GDP exchange activity of Cdc42 is increased by its only GEF, Cdc24, which is delivered to already active Cdc42 on the membrane by the effector Bem1<sup>15, 27</sup>. However, recruitment of Cdc24 and Bem1 to the cap is bounded by limited availability of the molecules involved<sup>14</sup>. We employed an effective description of this bounded positive feedback such that the activation rate for the process

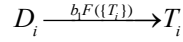

is given by a Michaelis-Menten law  $F(\{T_i\}) = T_i / (c_{th} + \tilde{\alpha}_i T_i)$  with amplitude  $b_i$ . Here  $D_i$  and  $T_i$  denote the number of passive and active Cdc42 respectively at site  $i$ . The denominator of  $F(\{T_i\})$  effectively limits GEF recruitment if the total amount of active Cdc42 substantially exceeds the threshold  $c_{th}$ . Moreover, we used a similar functional form  $F(\{T_i\})$  to account for GEF-mediated recruitment of Cdc42 from the cytosol with subsequent nucleotide-exchange

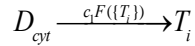

This term reflects direct or indirect competition for Cdc42 binding between GEF and GDI as shown in **Supplementary Fig. S2**. The resulting displacement of the GDI by the GEF has been suggested previously for mammalian Rho and Rab GTPases<sup>40, 41, 52</sup>. In the absence of GEF, nucleotide-exchange and membrane attachment of Cdc42-GDP are assumed to occur at background rates  $b_i$  and  $c_i$ .

Direct extraction of Cdc42-GDP from the plasma membrane is facilitated by interaction with its GDI Rdi1 (Fig. 3d and<sup>9, 17</sup>). We assumed that Rdi1 is present in large excess and diffuses rapidly in the cytosol. Therefore the extraction of Cdc42-GDP into the well-mixed cytosolic pool of Cdc42 is taken to occur with a constant rate  $d$ .

Since Rdi1 preferentially interacts with Cdc42-GDP (see Fig. 3d), the last reaction necessary for Rdi1-dependent polarization is hydrolysis of Cdc42-GTP. This we implemented as a first-order reaction with rate  $a$ . The reactions of the Rdi1-dependent polarization pathway are shown in Fig. 3c.

A second mechanism for Cdc42 recycling and cell polarization is provided by actin-mediated transport. We were mainly interested in how the distribution of Cdc42 affected the reorganization of the cytoskeleton and heuristically modelled the effective protein dynamics induced by endocytosis and exocytosis. Details of the model are shown in Fig. 3b.

We assumed that the nucleotide bound to Cdc42 does not change during recycling as intrinsic nucleotide exchange and hydrolysis rates are very low<sup>63</sup> and the GAP and GEF for Cdc42 are expected to be mostly active on the plasma membrane where they are present at higher concentration in polar caps or patches<sup>14</sup>. Cdc42 caps are maintained by a dynamic balance of focused exocytosis, dilution by lateral diffusion within the plasma membrane, and endocytosis<sup>37</sup>. We made the simplifying assumption that the total exocytic flux of Cdc42 remains the same before and after polarization for a given internal pool of cargo. The flux of

Cdc42 from the internal membranes is equally spread over the whole plasma membrane in unpolarized cells but is slightly focused in polarized cells. We implemented this in our model by allowing the “nucleation” of  $N_A = 2$  sites of increased exocytosis on the plasma membrane similar to earlier models<sup>37</sup>. As actin reorganization is under control of Cdc42-GTP we modelled the nucleation of stable actin bundles as

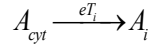

where  $A_{cyt}$  and  $A_i$  represent available and nucleated stable actin bundles, respectively, with  $\Sigma A_i + A_{cyt} = N_A$ .

The exocytic flux is described by the reactions

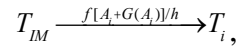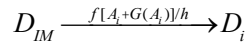

with  $G(\{A_i\}) = (h - \hat{\alpha}_i A_i)/n$ , where  $h$  describes a background exocytosis rate in regions not impinged upon by actin cables. This description allows for focused exocytosis along nucleated actin bundles while keeping total exocytosis constant. Finally, we approximated endocytosis of Cdc42 to internal membranes by a constant endocytosis rate  $g$ .

All reactions of the agent-based model are summarized in **Supplementary Table S8**:

**Parameter estimates.** To fit our model we first separately considered LatB-treated control and  $\Delta rdi1$  cells. The diffusion constant  $D$  of Cdc42, the total number  $N_{42}$  of Cdc42 and the intrinsic activation rate  $b_2$  were taken or estimated from published data<sup>14, 37, 63, 64</sup>. The average cell radius  $R$  was determined to be 3.95  $\mu\text{m}$ . As LatB-treated control cells show a Cdc42 mobility (FRAP) rate of approximately 0.28/s, we estimated the extraction rate  $d$  to be 0.5/s. As initial conditions for LatB-treated cells we distributed on average 20% of all Cdc42 to the plasma membrane, with the remaining Cdc42 being split equally between membranes and cytosol<sup>14</sup>. In simulations of  $\Delta rdi1$  cells the cytosolic fraction was redistributed to the membranes, with one third being allocated to the plasma membrane. To begin our simulation, we assumed that the GEF had just arrived at the plasma membrane, and started with an average fraction of active Cdc42 on all membranes determined by the ratio of intrinsic activation and hydrolysis. The activation threshold  $c_{th}$  limiting the total amount of active GEF

was estimated to be 100, given that roughly 300 Cdc42 molecules are localized to steady-state caps<sup>14, 64</sup>.

The remaining parameters were chosen such that the caps formed in LatB-treated and *Δrdi1* cells satisfied a set of constraints over an average of 400 runs. We fitted the GEF-dependent activation and recruitment rates  $b_1$  and  $c_1$ , and the hydrolysis and background insertion rates  $a$  and  $c_2$  in LatB simulations assuming exocytosis and endocytosis to be zero. Using previous FRAP and fractionation results<sup>14</sup> we estimated the fraction of Cdc42 in the cap at steady state to be 10%, with the same amount being distributed over the rest of the plasma membrane. From our data shown here (Fig. 4) and previous publications<sup>17, 37</sup> we estimated the height and width of Cdc42 caps to 10 times the background density and 10% of the circumference, respectively.

The fitting constraints were a Cdc42 FRAP time in steady-state LatB caps of 2-3 s, a total amount of Cdc42 on the plasma membrane of 15-25%, a cap height of 7-12 times the background, and a cap width of 8-12%. Each simulation was terminated after  $t_{end} = 1300$  s internal simulation time - comparable to the duration of our experiments and the time cells take to polarize after GEF release from the nucleus<sup>50, 65</sup>. A cap was deemed to have formed if a spatially averaged profile of Cdc42 (over 5% of the membrane) was higher than twice its average value. At the end of the simulation the number of caps and the particle density of Cdc42 were determined and a Gaussian distribution was fitted to the Cdc42 profile to quantify its shape. We defined the cap width as twice the distance between the turning points of the fit.

To simulate FRAP values, at time  $t_{frap} = 1200$  s the number of caps was determined. For simulations with a single cap, Cdc42 in a region corresponding to 20% of the plasma membrane and centred at the cap position was changed into a “non-fluorescent” version of Cdc42. The migration of fluorescent Cdc42 into the cap was then monitored and the recovery half-time  $T/2$  was calculated by fitting with a single exponential function.

After fitting the model to LatB-treated cells we used the parameters obtained and successively fitted the actin nucleation rate  $e$ , the exocytosis parameters  $f$  and  $h$ , and the endocytosis rate  $g$  for *Δrdi1* cells. Model parameters for *Δrdi1* cells were chosen such that steady-state caps had a FRAP recovery time of 10-12 s, with 30-40% of all Cdc42 on the plasma membrane, a cap height of 7-12 times background, 0-10% cells with double caps and 90-100% total polarization. For LatB-treated cells we obtained 19% of all Cdc42 on the plasma membrane, 40% on internal membranes, and 41% in the cytosol. For simulated *Δrdi1* cells we found that 67% of all Cdc42 was distributed to internal membranes and 33% to the plasma membrane. For control cells we found 20% on the plasma membrane, 40% in the cytosol, and 40% on internal membranes.

The results shown in Fig. 4-7 were obtained from 400 runs for each point in parameter space, with the same simulation time and evaluation procedure as described for fitting the model above. Model parameters used in simulations are summarized in **Supplementary Table S9**.

**Robustness of polarization dynamics.** The GDI-dependent polarization pathway alone can be described in terms of deterministic dynamics by a set of partial differential equations. This set of reaction-diffusion equations allows growth of a small perturbation of the unpolarized state and hence pattern formation. Our stochastic simulations of this pathway show that only one stable cluster is established. We address this behavior to the Cdc42 number conservation similar to other mass conserved polarity models<sup>28, 66</sup>. To check for robustness of this behavior against parameter variations we changed each reaction rate separately between 1/2 and twice its control cell value and found that either a single stable polarity cluster was formed at the end of the simulations or that in some cases the polarization efficiency was lost as for example for a higher hydrolysis rate (Fig. 6a). This analysis showed that the formation of a single stable polarity cluster opposed to multiple stable clusters is indeed a robust property of GDI-mediated polarization.

The actin-dependent polarization pathway alone is prone to production of multiple caps as there is always the possibility that actin bundles nucleate at two (or more) distant sites on the plasma membrane. However, the risk to form two distant polarization sites can be decreased by a reduction of the probability for actin bundle nucleation. This reduction provides the polarization site which is established first with more time to redistribute Cdc42 on the membrane and therefore enhances the probability to nucleate the second actin bundle in close vicinity to the first one. The actin bundle nucleation rate is given by the product of the local Cdc42-GTP concentration times rate constant  $e$ . Hence, a change of the hydrolysis rate allows to vary the probability for actin bundle nucleation. Indeed, we found that the number of double caps in simulated *Δrdi1* cells is reduced at higher hydrolysis rates as can be seen in Fig. 7c. Once formed clusters of this polarization pathway are stable as we assumed an irreversible actin bundle nucleation. To test for robustness of the ability to form multiple clusters we changed each reaction rate of the actin-dependent polarization pathway separately between 1/2 and twice its control cell value. We found that the risk to form two stable clusters did not vanish in most cases. However, for some changes we found that the number of double caps was strongly reduced, e.g. for a higher hydrolysis rate as can be seen in Fig. 7c. These observations were accompanied by a simultaneous reduction of the general polarization efficiency (e.g. compare Fig. 6a, 7c) and arise due to an insufficient probability to reliably

nucleate one or even two actin bundles in all cells within the simulation time of ~20 minutes. We concluded that the ability to occasionally form multiple stable clusters is a robust property of actin-dependent polarization as long as the polarization sites are established at all.

To check the robustness of unique control cell polarization we combined both polarization pathways and varied each model reaction rate separately between 1/2 and twice its control cell value. We found that the occurrence of multiple stable polarity clusters was inhibited or at least significantly reduced compared to the corresponding findings for the actin-dependent polarization pathway alone. Hence, the ability of control cells to suppress the establishment of multiple stable caps compared to *Δrdi1* cells is a robust model property. Stronger parameter changes are necessary to weaken this ability as for example shown in Fig. 7c for different hydrolysis rates. In this case we observed that the occurring multiple clusters were stable and localized together with the actin bundles indicating that the stability of multiple clusters arises from the actin part of the model. The influence of the parameter variations is summarized in **Supplementary Fig. S4**.

**Test of previous polarization model.** To experimentally verify the polarization model proposed by Goryachev and Pokhilko we considered the GEF Cdc24 dynamics predicted by this model. The model assumed that cytosolic Bem1-Cdc24 complexes ( $E_c$ ) can attach to the membrane with a basal rate  $k_1$  or attach by forming a complex  $M$  with Cdc42-GTP ( $T$ ) on the membrane with rate  $k_7$ . Membrane-bound Bem1-Cdc24 ( $E_m$ ) was allowed to detach with rate  $k_{-1}$  or to form a complex with Cdc42-GTP with rate  $k_4$ . The opposite reaction of the complex formation was included with rate  $k_{-4}$ .

Given these reactions we concluded that for very low Cdc42-GTP concentrations all Bem1-Cdc24 on the membrane will be given in its Cdc42-GTP independent form  $E_m$ . In contrast, for high Cdc42-GTP concentrations the reactions  $k_7$  and  $k_4$  will strongly enhance the formation of  $M$  complexes on the expense of  $E_m$  and  $E_c$ . Therefore, the fraction of Cdc24 on the membrane, which can detach to the cytosol with rate  $k_{-1}$ , gets smaller at higher Cdc42-GTP concentrations.

In general, the time scale at which Cdc24 is removed from a membrane compartment is given by the fraction of the total Cdc24 number and the protein flux  $J$  out of this compartment, i.e.

$t = (\dot{0} E_m + \dot{0} M) / J$ . Neglecting the contribution of the small lateral membrane diffusion the time  $\tau$  is given by

$$t = \frac{\dot{0} E_m + \dot{0} M}{k_{-1} \dot{0} E_m}.$$

Hence, given the aforementioned dependence of  $M$  and  $E_m$  on Cdc42-GTP the model predicts that time  $\tau$  depends on the concentration of Cdc42-GTP as well. To obtain a more quantitative expression for  $\tau$  we used approximate expressions for  $E_m$  and  $M$  derived by Goryachev and Pokhilko assuming rapid cytosolic diffusion, fast reaction kinetics compared to the membrane diffusion, and separation of time scales. These expressions are given by

$$E_m = E_c \left( \frac{k_1}{k_{-1}} + \frac{k_7}{k_{-1}} T \right) \text{ and } M = E_c T \left( \frac{k_4 k_7}{k_{-4} k_{-1}} T + \frac{k_4 k_1}{k_{-4} k_{-1}} + \frac{k_7}{k_{-4}} \right)$$

where  $E_c$  is assumed to be constant due to rapid cytosolic diffusion. The term of  $M$  with quadratic dependence on  $T$  represents the core reaction necessary for the Turing model. Using the parameters given by the authors we obtained<sup>28, 46</sup>.

$$E_m = E_c \left( 1 + \frac{T}{mM} \right) \text{ and } M = E_c \frac{T}{mM} \left( 2 + \frac{T}{mM} \right).$$

Accordingly, for the exchange time  $\tau$  of Cdc24 we obtained

$$t = \frac{\dot{0} \left( 1 + \frac{T}{mM} \right) + \dot{0} \frac{T}{mM} \left( 2 + \frac{T}{mM} \right)}{k_{-1} \dot{0} \left( 1 + \frac{T}{mM} \right)}.$$

Note that the concentration of membrane-bound proteins is measured per volume in a 10 nm thick layer along the membrane<sup>28</sup>. Again we found that  $\tau$  depends on the concentration of active Cdc42. The time  $\tau$  can approximately be determined using fluorescence recovery after photobleaching (FRAP) of Cdc24. Importantly, we found that the FRAP time of polarized Cdc24 did not change as we reduced the Cdc42 hydrolysis by deletion of GAP Bem2 (**Supplementary Fig. S3B**) indicating that  $\tau$  is not affected by changes of Cdc42-GTP concentrations. According to the model by Goryachev  $\tau$  is only insensitive to changes in Cdc42-GTP concentration if  $T \ll 1mM$  in the cluster. However, this condition implies that  $M \ll E_m$ ,  $M \sim T$  and  $E_m = const$ . Hence, the model by Goryachev implies that the Cdc24 FRAP rate is only unaffected by changes of Cdc42 hydrolysis if the total Cdc24  $E_m + M$  is almost homogeneously distributed along the membrane. This clearly contradicts experiments showing that Cdc24 accumulates at the polarization site<sup>14</sup>.

## 4. Supplementary References

60. Gulli, M.P. *et al.* Phosphorylation of the Cdc42 exchange factor Cdc24 by the PAK-like kinase Cla4 may regulate polarized growth in yeast. *Mol Cell* **6**, 1155-1167 (2000).
61. Gillespie, D.T. Exact stochastic simulation of coupled chemical reactions. *The Journal of Physical Chemistry* **81**, 2340-2361 (1977).
62. Bernstein, D. Simulating mesoscopic reaction-diffusion systems using the Gillespie algorithm. *Phys Rev E Stat Nonlin Soft Matter Phys* **71**, 041103 (2005).
63. Zheng, Y., Cerione, R. & Bender, A. Control of the yeast bud-site assembly GTPase Cdc42. Catalysis of guanine nucleotide exchange by Cdc24 and stimulation of GTPase activity by Bem3. *J Biol Chem* **269**, 2369-2372 (1994).
64. Ghaemmaghami, S. *et al.* Global analysis of protein expression in yeast. *Nature* **425**, 737-741 (2003).
65. Shimada, Y., Gulli, M.P. & Peter, M. Nuclear sequestration of the exchange factor Cdc24 by Far1 regulates cell polarity during yeast mating. *Nat Cell Biol* **2**, 117-124 (2000).
66. Otsuji, M. *et al.* A mass conserved reaction-diffusion system captures properties of cell polarity. *PLoS Comput Biol* **3**, e108 (2007).
